# Supplementary material for: Poly(vinyl)chloride supported palladium nanoparticles: catalyst for rapid hydrogenation reactions
Source: Royal Society of Chemistry journal article supplement (doi:10.1039/c0ob00962h), 2011-01-01

Electronic supplementary information  
**Poly(vinyl)chloride supported palladium nanoparticles: Catalyst for  
rapid hydrogenation reactions**

Hosahalli P. Hemantha and Vommina V. Sureshbabu\*

*Peptide Research Laboratory, Department of Studies in Chemistry, Central College  
Campus, Dr. B. R. Ambedkar Veedhi, Bangalore University, Bangalore-560 001, India*

E-mail: [sureshbabuvommina@rediffmail.com](mailto:sureshbabuvommina@rediffmail.com); [hariccb@hotmail.com](mailto:hariccb@hotmail.com);

[hariccb@gmail.com](mailto:hariccb@gmail.com)

| <b>Page</b> | <b>Contents</b>                                                                                                                                           |
|-------------|-----------------------------------------------------------------------------------------------------------------------------------------------------------|
| S1-S2.....  | Description                                                                                                                                               |
| S2.....     | SEM images of PVC-Pd <sup>0</sup>                                                                                                                         |
| S3.....     | SEM and TEM images of PVC-Pd <sup>0</sup>                                                                                                                 |
| S4.....     | SEM and TEM images of PVC-Pd <sup>0</sup> recovered after 3 <sup>rd</sup> cycle                                                                           |
| S5-S9.....  | Characterization data, table illustrating the efficiency of recovered catalyst and a table for comparing the efficiency of PVC-Pd <sup>0</sup> with Pd/C. |
| S10.....    | ESI-MS of Benzene-1,4-diamine (Table 1, entry 1)                                                                                                          |
| S11.....    | HR-MS of (2,3,4,6-tetra- <i>O</i> -acetyl- $\beta$ -D-glucopyranosyl-1-amine (Table 1, entry 9)                                                           |
| S12.....    | HR-MS of Methyl 3-phenylpropanoate (Table 1, entry 14)                                                                                                    |
| S13.....    | HR-MS of <i>N</i> -phenylpropionamide (Table 1, entry 16)                                                                                                 |
| S14.....    | HR-MS of <i>N</i> -benzylbenzenamine (Table 1, entry 18)                                                                                                  |
| S15.....    | HR-MS of Ala(Oxa) (Table 2, entry 10)                                                                                                                     |
| S16.....    | HR-MS of Fmoc-MeLeu-MeLeu-OH (Table 3, entry 1)                                                                                                           |
| S17.....    | HR-MS of H-Leu-Phe-Gly-Gly-Arg-OMe (Table 3, entry 6)                                                                                                     |
| S18.....    | HPLC of Benzene-1,4-diamine (Table 1, entry 1) and 2-amiophenol (Table 1, entry 3)                                                                        |
| S19.....    | HPLC of <i>N</i> -benzylbenzenamine (Table 1, entry 18) and H-Glu-OH (Table 2, entry 9)                                                                   |
| S20.....    | HPLC of Ala(Oxa) (Table 2, entry 10) and Fmoc-Leu-OH (Table 2, entry 4)                                                                                   |

- S21.....HPLC of H-Leu-Phe-Gly-Gly-Arg-OMe (Table 3, entry 6)  
S22.....<sup>1</sup>H NMR of Benzene-1,4-diamine (Table 1, entry 1)  
S23.....<sup>1</sup>H NMR of Benzylamine (Table 1, entry 8)  
S24.....<sup>1</sup>H NMR of *N*-benzylbenzenamine (Table 1, entry 18)  
S25.....<sup>13</sup>C NMR of Methyl 3-phenylpropanoate (Table 1, entry 14)  
S26.....<sup>1</sup>H NMR of Ala(Oxa) (Table 2, entry 10)  
S27.....<sup>1</sup>H NMR of H-Leu-Phe-Gly-Gly-Arg-OMe (Table 3, entry 6)

SEM image of PVC-Pd<sup>0</sup>

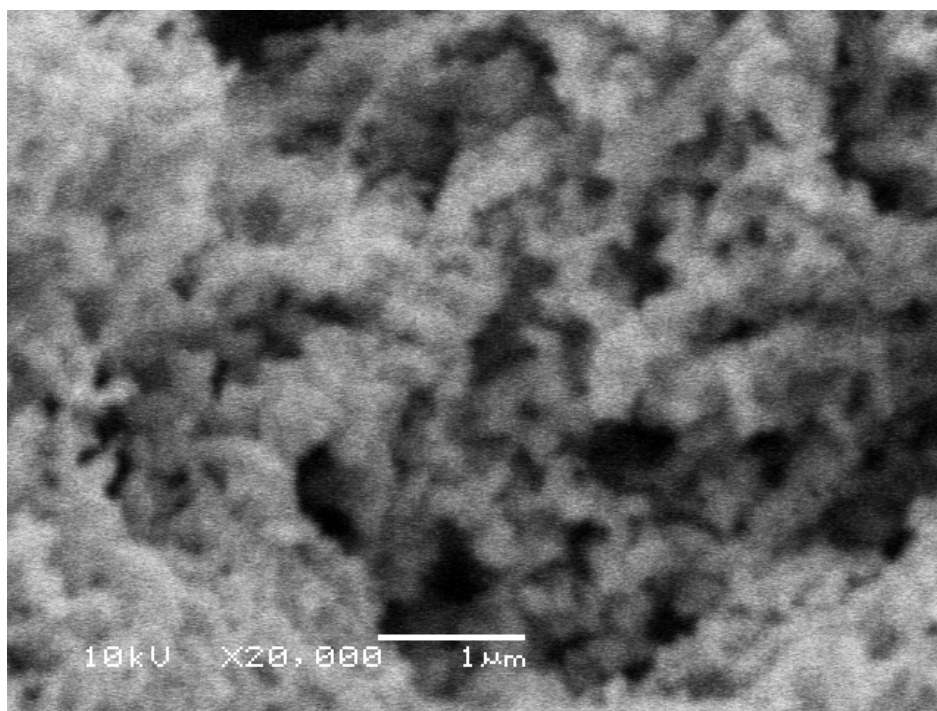

SEM image of PVC-Pd<sup>0</sup>

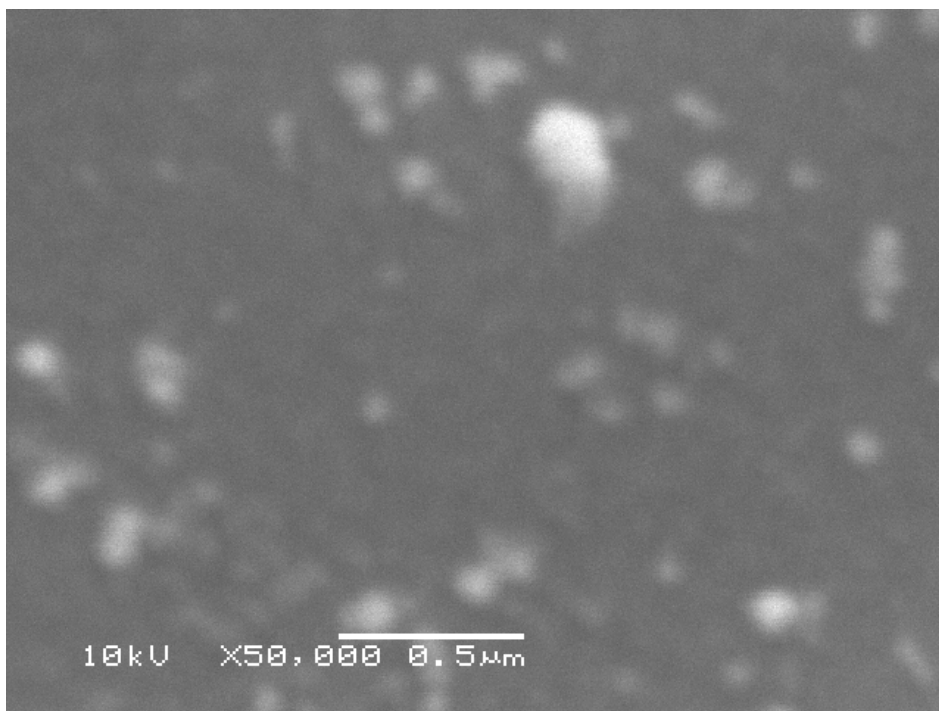

TEM image of PVC-Pd<sup>0</sup> (bar length= 20 nm)

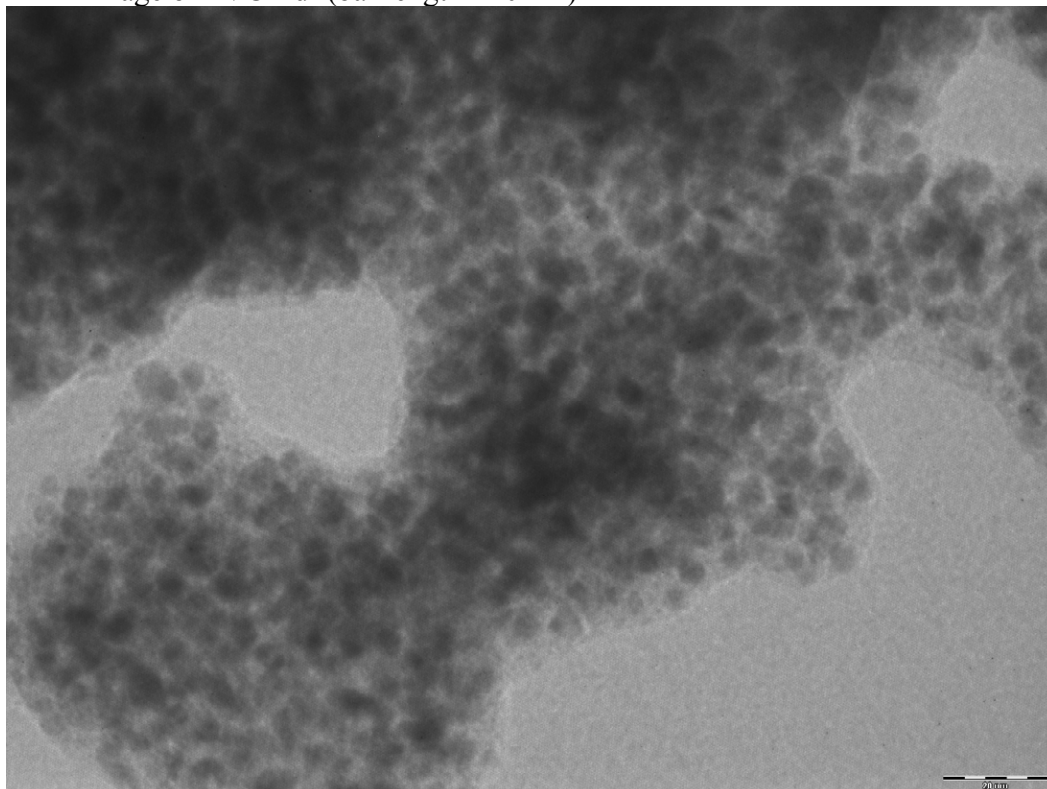

SEM image of PVC-Pd<sup>0</sup> (after 3 cycles)

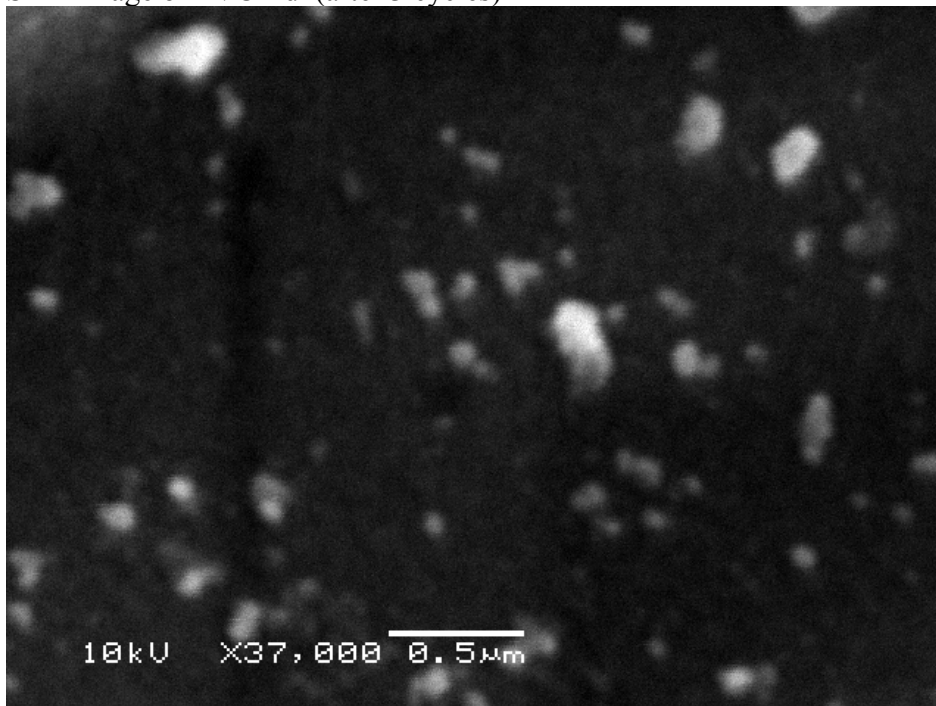

TEM image of PVC-Pd<sup>0</sup> (after 3 cycles) (bar length = 20 nm)

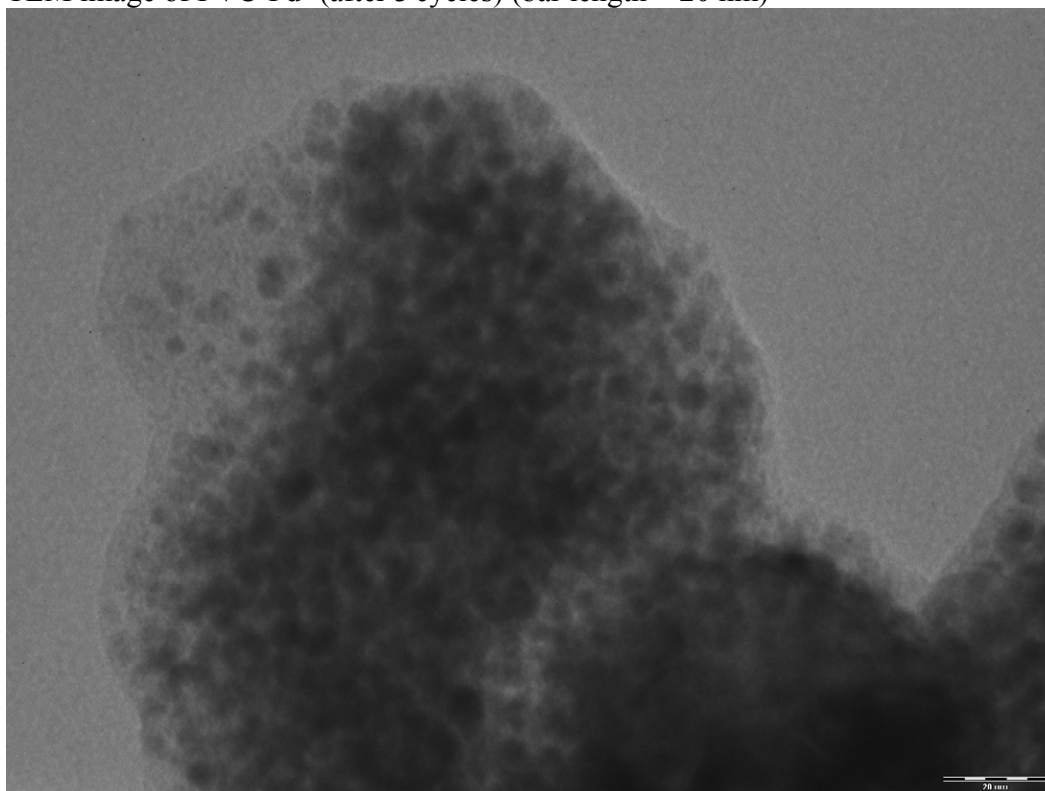

### General remarks:

$^1\text{H}$  NMR and  $^{13}\text{C}$  NMR were recorded on a Bruker AMX 400 MHz instrument with tetramethyl silane (TMS) as an internal standard. Mass spectra were recorded on high resolution mass spectra (HRMS) Q-ToF micro mass spectrometer. All the reactions were monitored using TLCs with precoated silica gel plates purchased from Merck. HPLC analyses were made using Agilent 1100 series having G1311A VWD at  $\lambda=254$  nm or 210 nm, flow 0.5 mL/min, Column: Agilent Eclipse XDB-C18, pore size- $5\mu\text{m}$ , diameter x length =  $4.6 \times 150$  mm; Method: gradient 0.1% TFA water-acetonitrile; acetonitrile 30-70 % in 30 min or 40-90 % in 30 min. IR measurements were made on a Nicolet model impact 400 D FT-IR spectrometer (KBr pellets,  $3\text{ cm}^{-1}$  resolution). PVC was purchased from Sigma-Aldrich as granules and used as such.

ICP-OES data were obtained from Shiva Analyticals (India) Ltd., Bangalore 562114, India using Perkin Elmer OPTIMA 5300DV. In brief, known quantity of sample was weighed into a beaker, digested in aquaregia, cooled and made up to a known volume. The instrument was calibrated with NIST traceable standard and aspirated the sample solution by ICP-OES.

### Characterization data for selected compounds:

**Benzene-1,4-diamine** (Table 1, entry 1): Solid, m.p.  $137-139\text{ }^\circ\text{C}$  (reported:  $138-143$ );  $^1\text{H}$  NMR (DMSO- $d_6$ , 400 MHz)  $\delta$ : 3.72 (4H, br), 6.21 (4H, d,  $J = 5.4$  Hz);  $^{13}\text{C}$  NMR (DMSO- $d_6$ , 200 MHz)  $\delta$ :

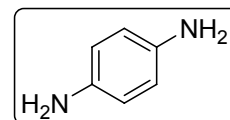

121.2, 137.6. ESI-MS Calcd for  $\text{C}_6\text{H}_8\text{N}_2$ : 108.06; found: 109.20 (M+H) $^+$ .

**4-aminobenzoic acid** (Table 1, entry 2): Solid, m.p.  $190-192\text{ }^\circ\text{C}$  (reported:  $187-189\text{ }^\circ\text{C}$ );

$^1\text{H}$  NMR (DMSO- $d_6$ , 400 MHz)  $\delta$ : 3.21 (2H, s), 6.57 (2H, d,  $J = 5.8$  Hz), 7.12 (2H, d,  $J = 4.4$  Hz), 10.31 (1H, s);  $^{13}\text{C}$  NMR (DMSO- $d_6$ , 200 MHz)  $\delta$ : 119.3, 126.2, 133.6, 141.5, 171.0; HR-

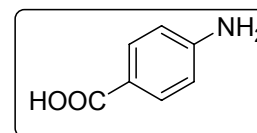

MS Calcd for  $\text{C}_7\text{H}_7\text{NaNO}_2$ : 160.0374; found: 160.0377 [M+Na] $^+$ .

**2-amiophenol** (Table 1, entry 3): Solid, m.p.  $170-173\text{ }^\circ\text{C}$  ( $170-175\text{ }^\circ\text{C}$ );  $^1\text{H}$  NMR (DMSO- $d_6$ , 400 MHz)  $\delta$ : 3.23 (2H, s), 4.72 (1H, s), 6.31-6.72 (4H, m);

$^{13}\text{C}$  NMR (DMSO- $d_6$ , 200 MHz)  $\delta$ : 117.2, 119.3, 123.4, 125.9, 132.1,

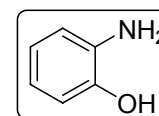

143.0; ES-MS Calcd for  $\text{C}_6\text{H}_7\text{NO}$ : 109.05, found: 110.12 (M+H).

**Benzene-1,3-diamine** (Table 1, entry 4): Solid, m.p. 64-65 °C (reported 64-66 °C); <sup>1</sup>H NMR (DMSO-*d*<sub>6</sub>, 400 MHz) δ: 4.11 (4H, s), 5.61 (1H, s), 5.97-6.14 (3H, m); <sup>13</sup>C NMR (DMSO-*d*<sub>6</sub>, 200 MHz) δ: 106.7, 110.1, 132.2, 144.9.

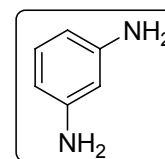

**Aniline** (Table 1, entry 5): Liquid. ESI-MS Calcd for C<sub>6</sub>H<sub>7</sub>N: 93.13; found 94.0 (M+H)<sup>+</sup>.

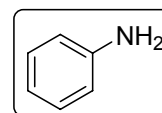

**Cyclohexylamine** (Table 1, entry 6): Liquid; Completion of reaction was confirmed through IR analysis.

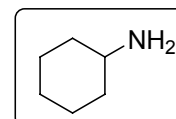

**Methyl-2-aminoacetate** (Table 1, entry 7): Gum. <sup>1</sup>H NMR (DMSO-*d*<sub>6</sub>, 400 MHz) δ: 3.65 (3H, s), 3.92 (2H, m), 6.11 (2H, br); <sup>13</sup>C NMR (200 MHz, DMSO-*d*<sub>6</sub>) δ: 40.2, 51.6, 169.2; HR-MS Calcd for C<sub>3</sub>H<sub>7</sub>NNaO<sub>2</sub>: 112.0374; found: 112.0360 [M+Na]<sup>+</sup>.

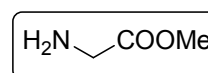

**Benzylamine** (Table 1, entry 8): Liquid, <sup>1</sup>H NMR (CDCl<sub>3</sub>, 400 MHz) δ: 3.66 (2H, m), 6.21 (2H, br), 7.01-7.21 (5H, m); <sup>13</sup>C NMR (CDCl<sub>3</sub>, 200 MHz) δ: 52.0, 125.5, 127.9, 128.4, 139.3.

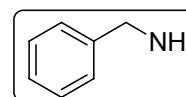

**(2,3,4,6-tetra-*O*-acetyl-β-D-glucopyranosyl-1-amine** (Table 1, entry 9): Gum; <sup>1</sup>H NMR (CDCl<sub>3</sub>, 400 MHz) δ: 2.01-2.46 (12H, 4s), 4.12 (1H, m), 4.62 (1H, q), 4.99 (2H, d, *J* = 4.6 Hz), 5.50 (1H, t, *J* = 3.3 Hz), 5.73 (2H, m); HR-MS Calcd for C<sub>14</sub>H<sub>21</sub>NNaO<sub>9</sub>: 370.1114; found: 370.1127 [M+Na]<sup>+</sup>.

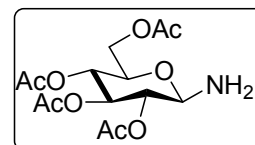

**Benzylalcohol** (Table 1, entry 10): Liquid; Quantitative disappearance of aldehyde signal (1722 cm<sup>-1</sup>) confirmed the completion of reaction.

**2-(hydroxymethyl)phenol** (Table 1, entry 11): Solid, m.p. 81-84 °C (reported: 81-83 °C); <sup>1</sup>H NMR (CDCl<sub>3</sub>, 400 MHz) δ: 4.62 (2H, s), 5.13-5.24 (2H, br), 6.65-7.13 (4H, m); <sup>13</sup>C NMR (CDCl<sub>3</sub>, 200 MHz) δ: 55.3, 120.3, 126.2, 128.1, 129.3, 129.8, 151.5; ES-MS Calcd for C<sub>7</sub>H<sub>8</sub>O<sub>2</sub>: 124.05; found 125.1 (M+H)<sup>+</sup>.

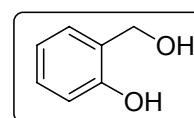

**3-methylbutan-1-ol** (Table 1, entry 12): Liquid; Complete disappearance of the aldehyde signal (1731 cm<sup>-1</sup>) was confirmed as the end point of the reaction.

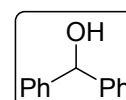

**Diphenylmethanol** (Table 1, entry 13): ES-MS Calcd for C<sub>13</sub>H<sub>12</sub>O:184.23; found: 185.12 (M+H)<sup>+</sup>; <sup>13</sup>C NMR (CDCl<sub>3</sub>, 200 MHz) δ: 75.2, 128.3, 128.9, 129.1.

**Methyl 3-phenylpropanoate** (Table 1, entry 14): Solid; m.p. 142-145 °C; <sup>1</sup>H NMR (CDCl<sub>3</sub>, 400 MHz) δ: 2.45-2.66 (4H, m), 3.67 (3H, s), 7.11-7.44 (5H, m); <sup>13</sup>C NMR (CDCl<sub>3</sub>, 200 MHz) δ: 29.2, 36.3, 52.3, 123.2, 127.6, 128.1, 139.2, 172.5; HR-MS Calcd for C<sub>10</sub>H<sub>12</sub>NaO<sub>2</sub>: 187.0735; found 187.0754 [M+Na]<sup>+</sup>.

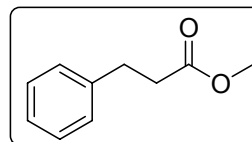

**N-propanol** (Table 1, entry 15): Liquid; Complete disappearance of alkyne signal (2121 cm<sup>-1</sup>) in the IR spectrum was confirmed as the end point.

**N-phenylpropionamide** (Table 1, entry 16): Solid; m.p. 123-126 °C; <sup>1</sup>H NMR (CDCl<sub>3</sub>, 400 MHz) δ: 1.21 (3H, t, J = 3.3 Hz), 2.25 (2H, q), 6.22 (1H, br), 7.21-7.54 (5H, m); <sup>13</sup>C NMR (CDCl<sub>3</sub>, 200 MHz) δ: 15.1, 28.6, 124.8, 127.7, 128.5, 138.6, 173.4; HR-MS Calcd for C<sub>9</sub>H<sub>11</sub>NaNO: 172.0738; found: 172.0728 [M+Na]<sup>+</sup>.

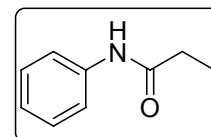

**N-Isopentylbenzeneamine** (Table 1, entry 17) <sup>1</sup>H NMR (CDCl<sub>3</sub>, 400 MHz) δ: 1.01 (6H, d, J = 4.8 Hz), 1.53 (2H, m), 1.78 (1H, m), 3.51 (2H, m), 6.41-6.62 (5H, m); <sup>13</sup>C NMR (CDCl<sub>3</sub>, 200 MHz): 21.6, 24.8, 41.1, 43.4, 112.9, 119.8, 132.0, 139.9; HR-MS Calcd for C<sub>11</sub>H<sub>17</sub>NNa: 186.1259; found: 186.1269 [M+Na]<sup>+</sup>.

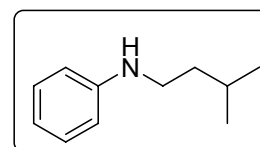

**N-benzylbenzenamine** (Table 1, entry 18): <sup>1</sup>H NMR (CDCl<sub>3</sub>, 400 MHz) δ: 4.16 (2H, d), 5.42 (1H, br), 6.61-6.83 (10 H, m); <sup>13</sup>C NMR (CDCl<sub>3</sub>, 200 MHz): δ 46.2, 113.1, 118.5, 125.5, 127.6, 127.9, 128.8, 139.8, 141.0; HR-MS Calcd for C<sub>13</sub>H<sub>13</sub>NNa: 206.0946; found: 206.0955 [M+Na]<sup>+</sup>.

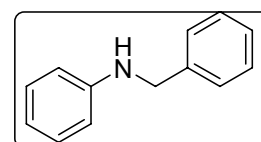

### Physical data for the products listed in Table 2 of the MS

| Entry | Product      | m.p.(°C)  |           | HPLC Purity |
|-------|--------------|-----------|-----------|-------------|
|       |              | Reported  | Obtained  |             |
| 1     | H-Phe-OH     | 270-275   | 272-276   | 99%         |
| 2     | H-Lys(Boc)OH | 250 (dec) | 249 (dec) | 97%         |
| 3     | Fmoc-Pro-OH  | 117-118   | 115-116   | 98%         |

|    |             |         |         |      |
|----|-------------|---------|---------|------|
| 4  | Fmoc-Leu-OH | 152-156 | 155-158 | 100% |
| 5  | Boc-Asp-OH  | 116-118 | 114-117 | 95%  |
| 6  | Boc-His-OH  | 195     | 197-198 | 92%  |
| 7  | Boc-Tyr-OH  | 133-135 | 133-134 | 100% |
| 8  | Boc-Thr-OMe | ----    | Gum     | 91%  |
| 9  | H-Glu-OH    | 205     | 205-207 | 100% |
| 10 | Ala(Oxa)    | ----    | 122-126 | 94%  |

### Recycling efficiency of PVC-Pd<sup>0</sup>

| Substrate             | Reduction efficiency (isolated yield, duration in min) |                                    |                                    |                                    |
|-----------------------|--------------------------------------------------------|------------------------------------|------------------------------------|------------------------------------|
|                       | Fresh catalyst                                         | Catalyst recovered after 1st cycle | Catalyst recovered after 2nd cycle | Catalyst recovered after 3rd cycle |
| Benzaldehyde          | 100%,<br>30 min                                        | 100%, 30 min                       | 98%, 35 min                        | 92%, 40 min                        |
| <i>O</i> -nitrophenol | 95%,<br>35 min                                         | 94%, 35 min                        | 95%, 40 min                        | 90%, 40 min                        |

### Illustrative examples for comparison of efficiency of PVC-Pd<sup>0</sup> over Pd/C

| Substrate                                                                           | Reduction yield, duration |             |
|-------------------------------------------------------------------------------------|---------------------------|-------------|
|                                                                                     | With PVC-Pd <sup>0</sup>  | With Pd/C   |
| 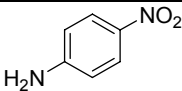 | 99%, 35 min               | 100%, 2.0 h |
|  | 96%, 35 min               | 97%, 2.5 h  |
|  | 94%, 60 min               | 82%, 4.2 h  |
| Z-Phe-OH                                                                            | 100%, 30 min              | 95%, 2.5 h  |
| Z-Glu(OBzl)OH                                                                       | 98%, 80 min               | 78%, 4.1 h  |
| Z-Ala-Asp(OBzl)-<br>Ser-Gly-OH                                                      | 78%, 110 min              | 65%, 5.2 h  |



**Boc-Thr-OMe** (Table 2, entry 8) Gum;  $^1\text{H}$  NMR ( $\text{CDCl}_3$ , 400 MHz)  $\delta$ : 1.19 (3H, d,  $J = 5.2$  Hz), 1.27 (9H, s), 3.41 (1H, m), 3.57 (3H, s), 4.21 (1H, m);  $^{13}\text{C}$  NMR ( $\text{CDCl}_3$ , 200 MHz):  $\delta$  18.3, 27.9, 53.3, 58.2, 65.9, 80.6, 155.3, 172.0; ESI-MS: Calc for  $\text{C}_{10}\text{H}_{19}\text{NO}_5$ : 233.2; found: 234.5  $[\text{M}+\text{H}]^+$ .

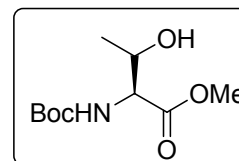

**Ala(Oxa)** (Table 2, entry 10): Solid; m.p. 122-126 °C;  $^1\text{H}$  NMR ( $\text{CDCl}_3$ , 400 MHz)  $\delta$ : 1.65 (3H, d,  $J = 5.6$  Hz), 3.57 (1H, m), 4.89 (2H, s);  $^{13}\text{C}$  NMR ( $\text{CDCl}_3$ , 200 MHz):  $\delta$  16.9, 62.6, 79.3, 176.3; HR-MS Calcd for  $\text{C}_4\text{H}_8\text{NO}_2$ : 102.0555; found 102.0575  $[\text{M}+\text{H}]^+$ .

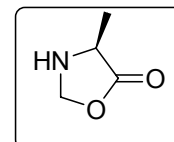

**Fmoc-MeLeu-MeLeu-OH** (Table 3, entry 1): Solid; m.p. 116-119 °C;  $^1\text{H}$  NMR ( $\text{CDCl}_3$ , 400 MHz)  $\delta$ : 0.93 (6H, d,  $J = 5.63$  Hz), 1.01 (6H, d,  $J = 4.8$  Hz), 1.65-1.72 (4H, m), 1.79-1.83 (2H, m), 3.07 (6H, s), 3.92 (2H, m), 4.11 (1H, t,  $J = 3.2$  Hz), 4.27 (2H, d,  $J = 5.5$  Hz), 6.92-7.34 (8H, m), 11.01 (1H, s); HR-MS Calcd for  $\text{C}_{28}\text{H}_{38}\text{N}_2\text{NaO}_5$ : 517.2678; found: 517.2689  $[\text{M}+\text{Na}]^+$ .

**Fmoc-MeLeu-Val-MeLeu-Ala-OH** (Table 3, entry 2):  $^1\text{H}$  NMR ( $\text{CDCl}_3$ , 400 MHz)  $\delta$ : 0.78-0.96 (18H, m), 1.33 (3H, d,  $J = 6.6$  Hz), 1.45 (1H, m), 1.65 (4H, m), 1.87 (2H, m), 3.11 (6H, s), 3.77-3.82 (4H, m), 4.13-4.24 (3H, m), 6.47 (2H, br), 7.10-7.44 (8H, m), 10.56 (1H, s); ESI-MS: Calcd for  $\text{C}_{37}\text{H}_{52}\text{N}_4\text{O}_7$ : 664.3; found 687.2  $[\text{M}+\text{Na}]^+$ .

**H-Leu-Phe-Gly-Gly-Arg-OMe** (Table 3, entry 6):  $^1\text{H}$  NMR ( $\text{DMSO}$ ,  $d_6$ , 400 MHz)  $\delta$ : 0.91 (6H, d,  $J = 6.2$  Hz), 1.53-1.65 (4H, m), 1.76 (2H, m), 1.83 (1H, m), 2.11 (2H, br), 2.40 (2H, m), 2.78 (2H, d,  $J = 5.2$  Hz), 3.51-3.57 (2H, m), 3.75 (3H, s), 4.11-4.23 (4H, m), 4.45 (1H, m), 6.53-6.78 (5H, br), 7.12 (5H, m), 9.37 (2H, br);  $^{13}\text{C}$  NMR ( $\text{DMSO}$ ,  $d_6$ , 200 MHz): 19.6, 21.1, 24.6, 28.3, 35.2, 37.8, 42.3, 44.6, 45.6, 51.6, 54.0, 55.3, 55.6, 126.9, 127.2, 128.2, 139.4, 156.3, 169.6, 170.6, 172.3, 173.3, 174.1; HRMS Calcd for  $\text{C}_{26}\text{H}_{42}\text{N}_8\text{NaO}_6$ : 585.3125; found: 585.3135  $[\text{M}+\text{Na}]^+$ .

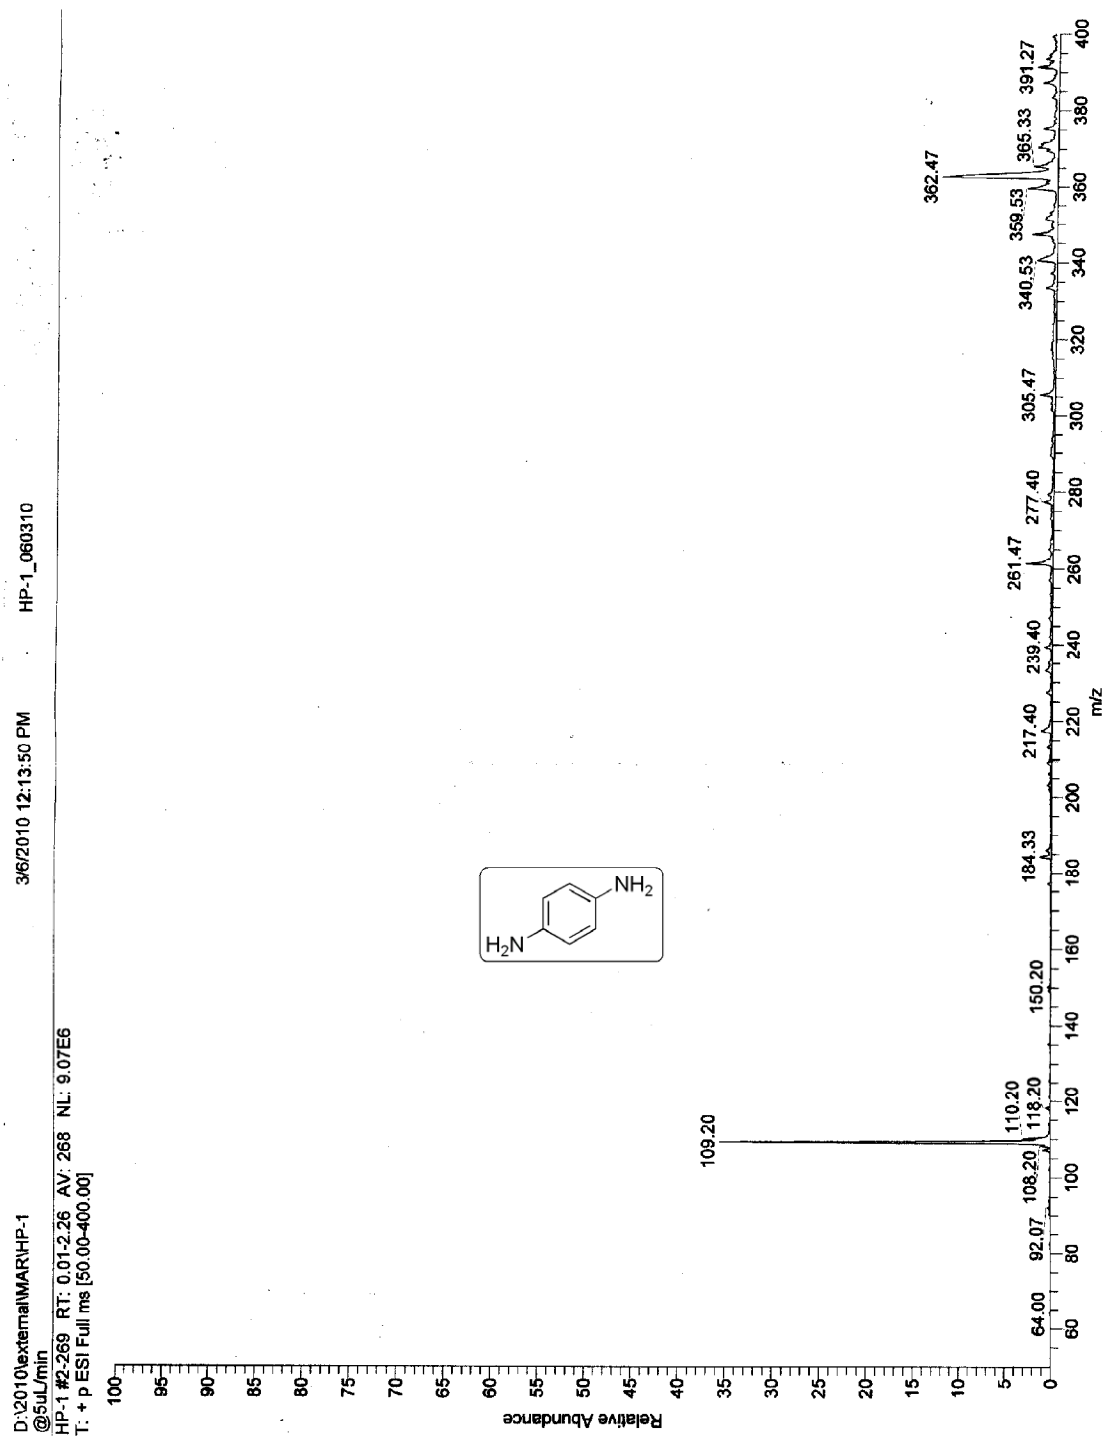

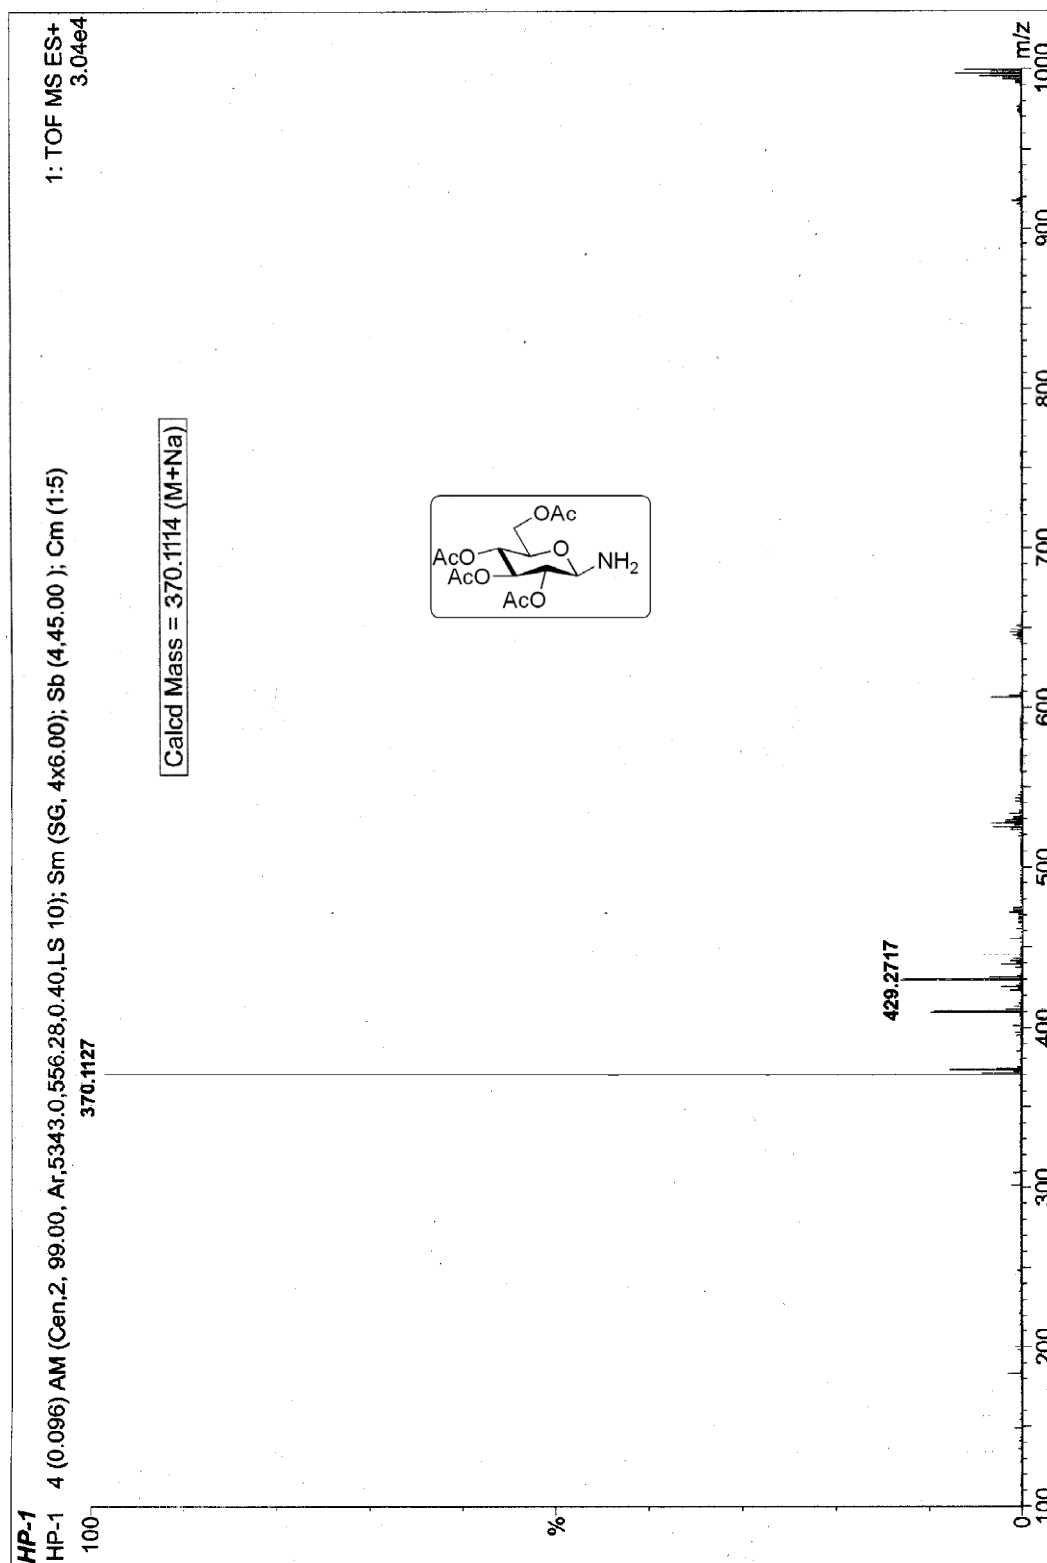

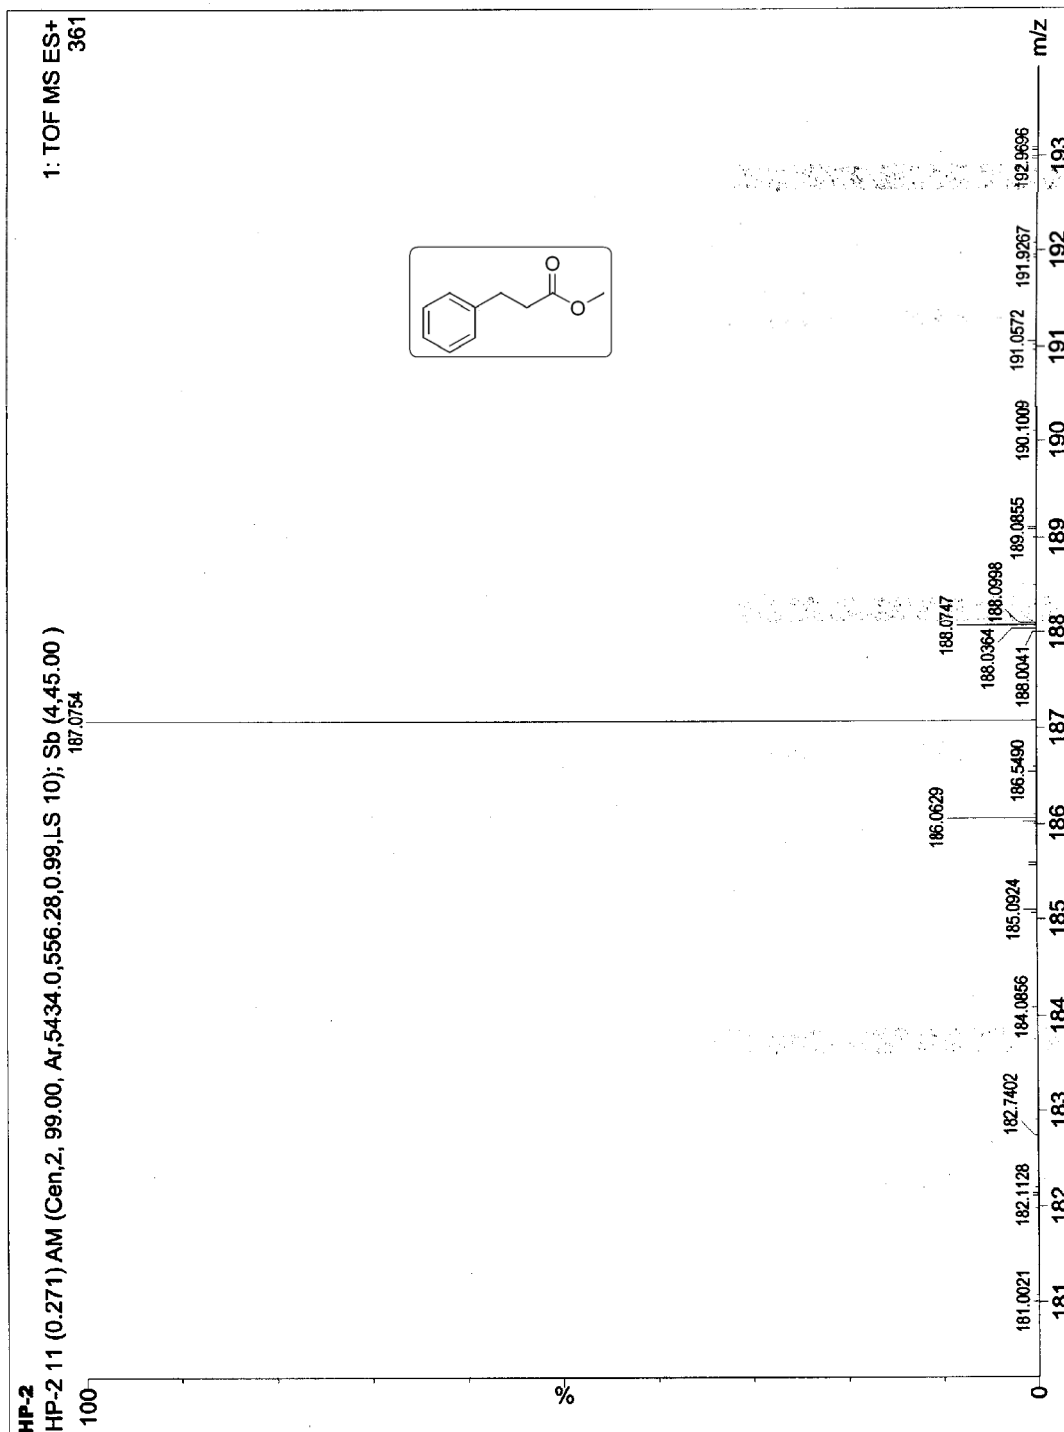

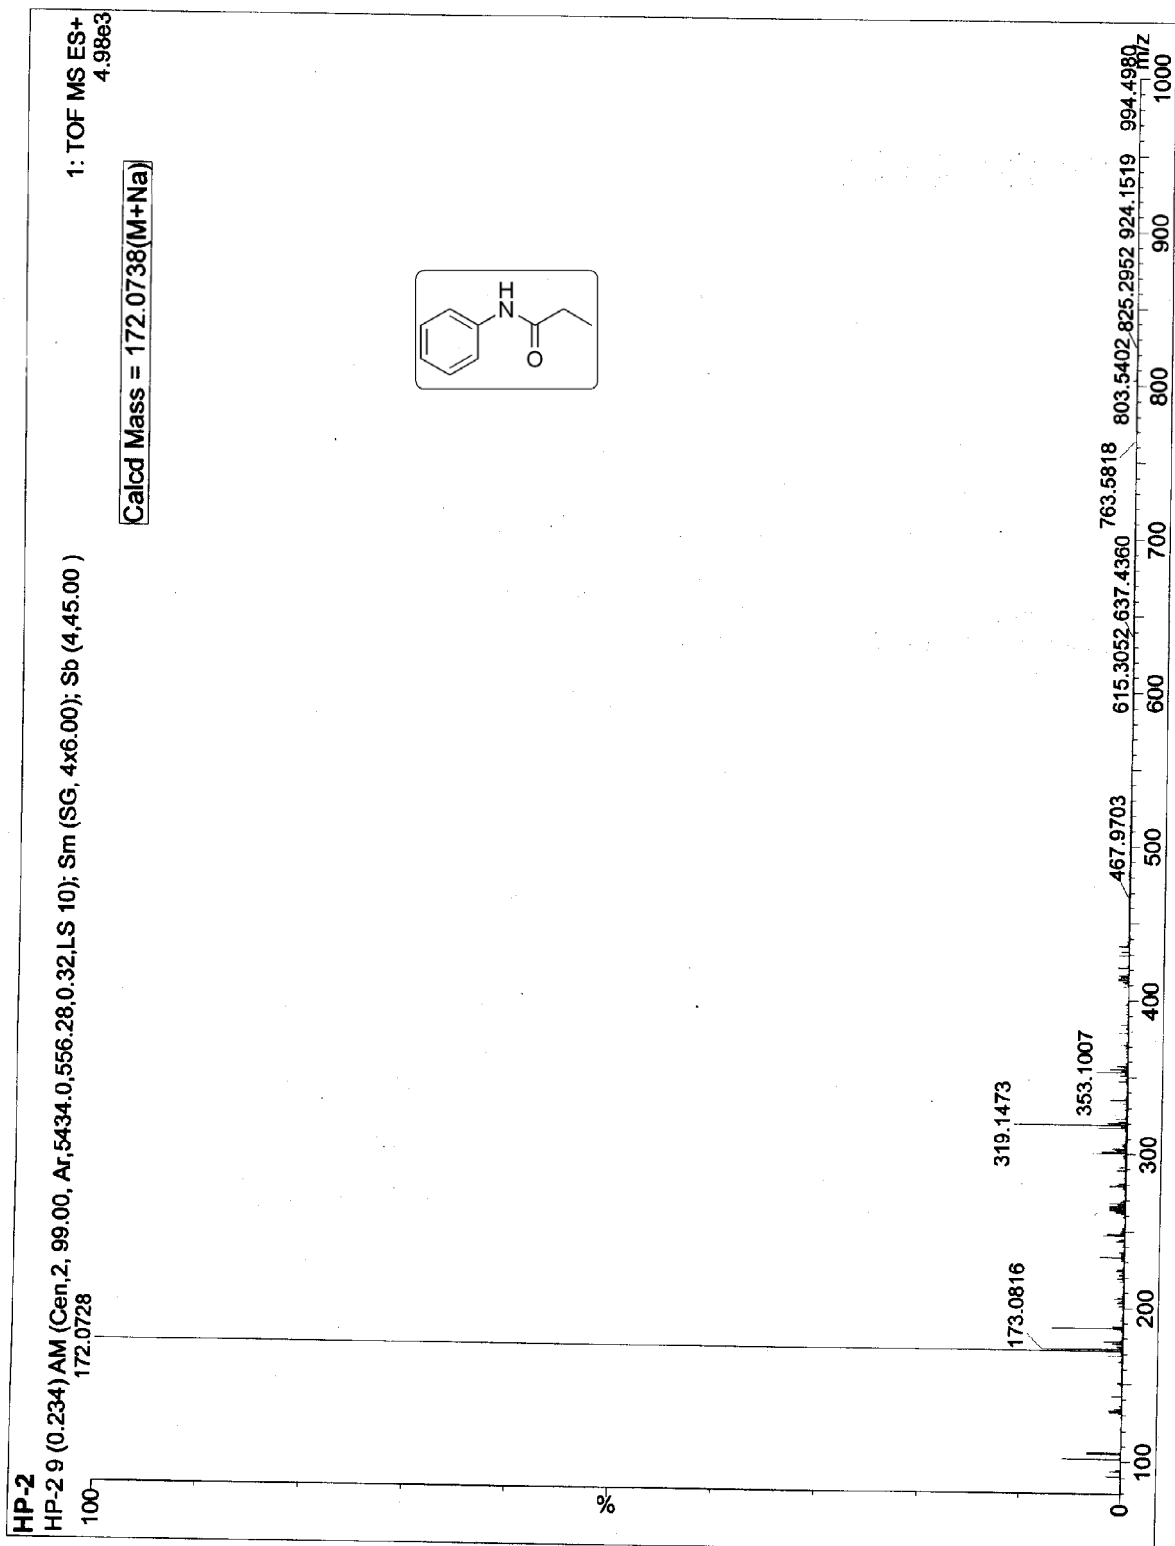

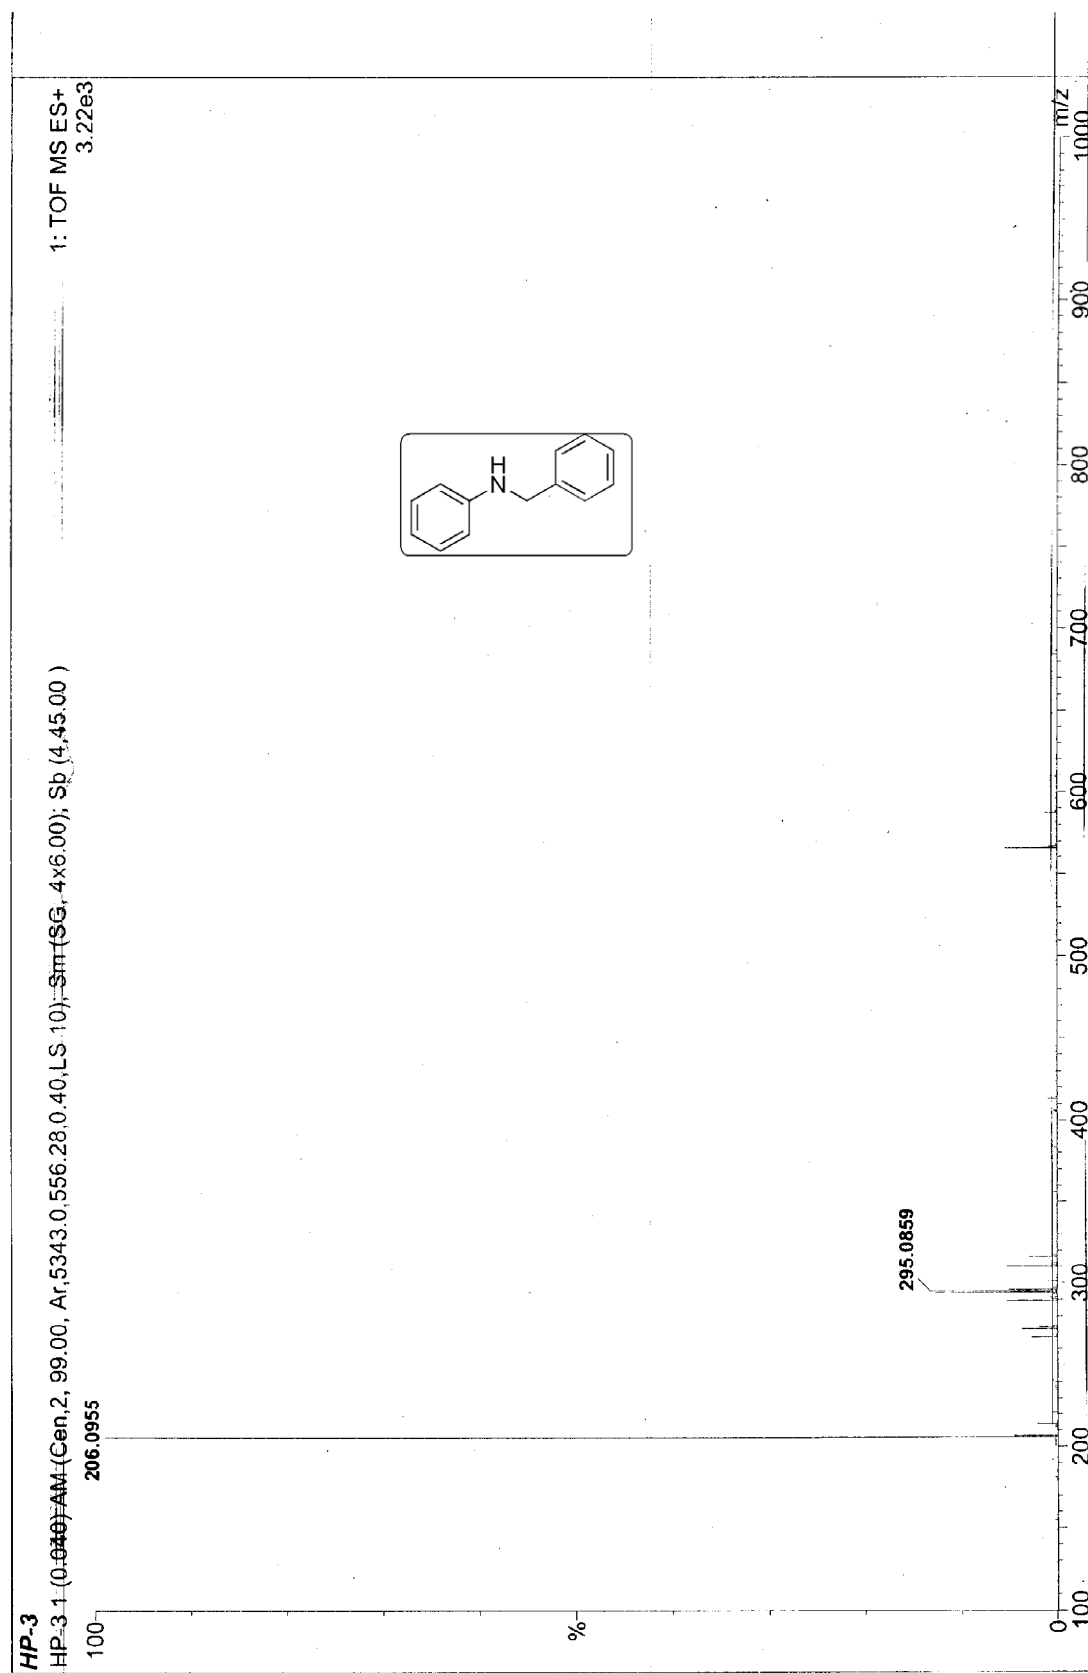

HP-10

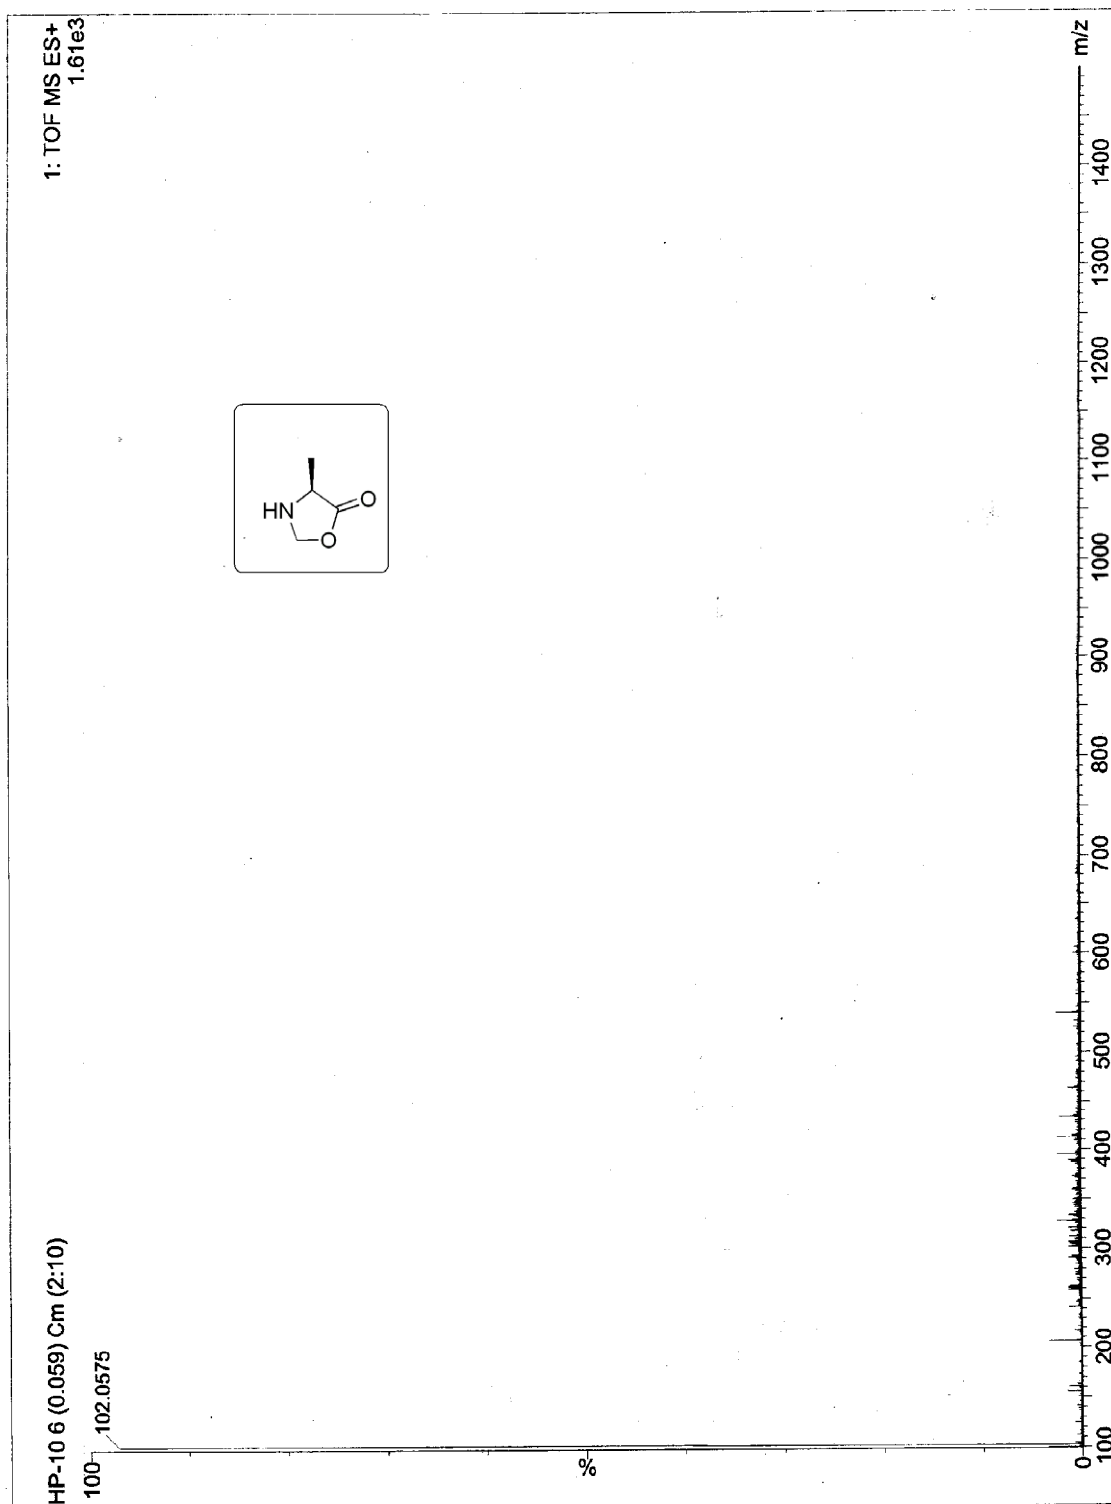

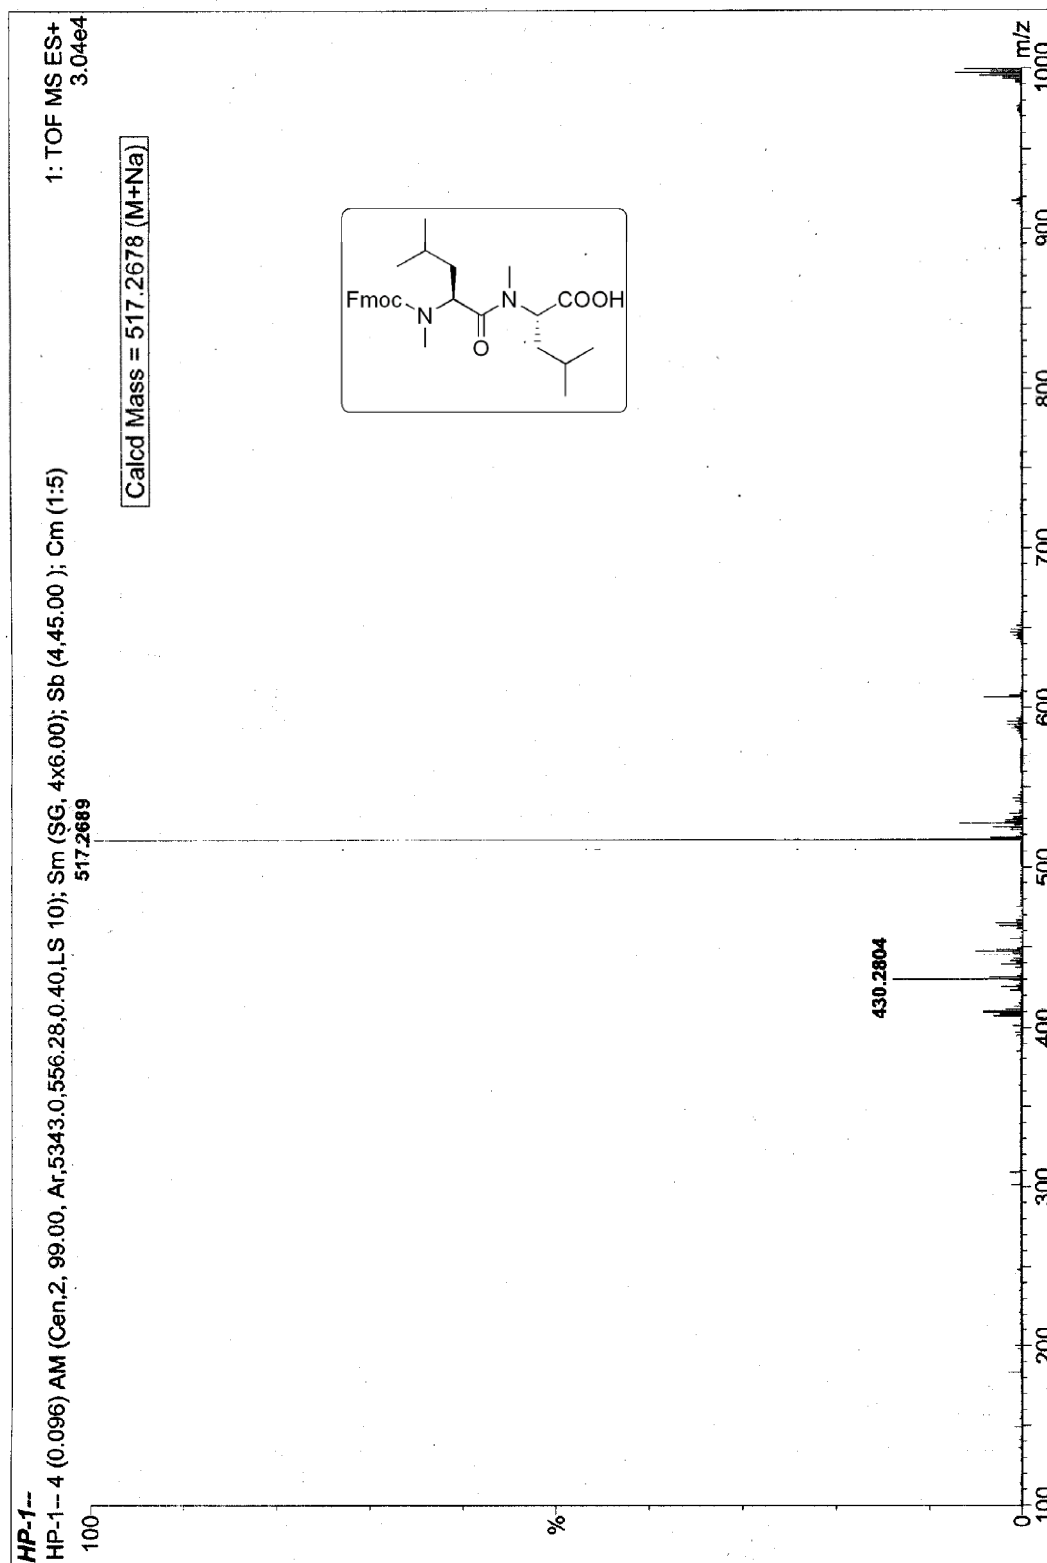



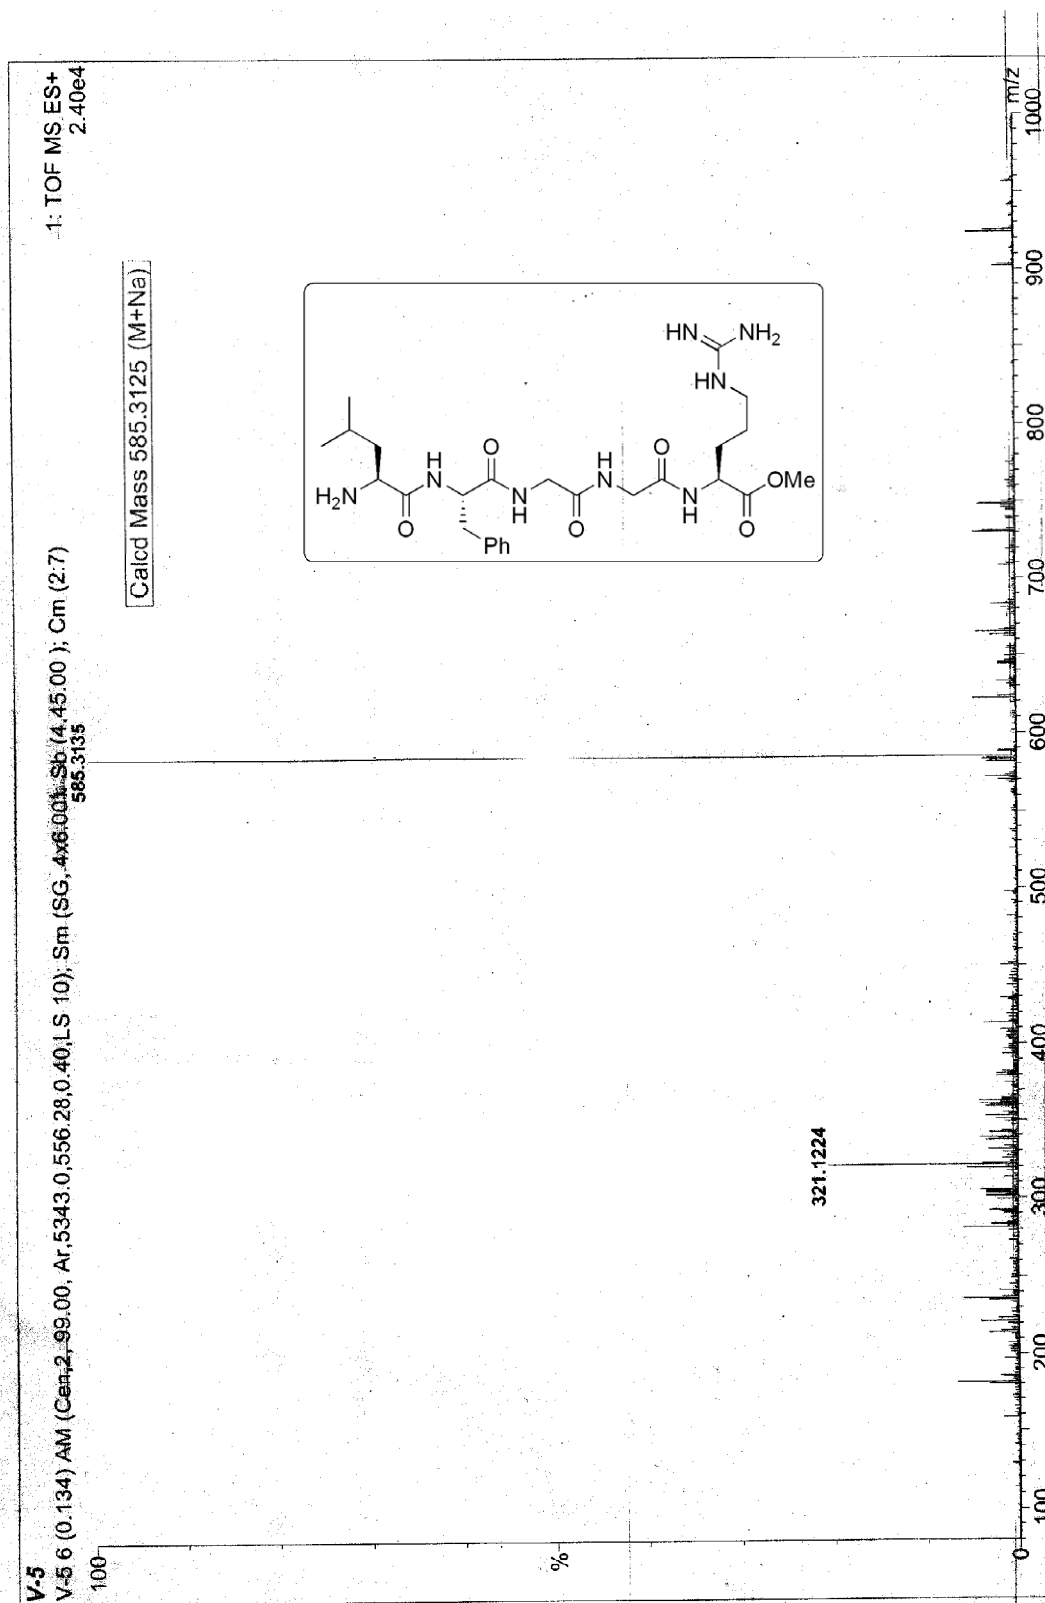

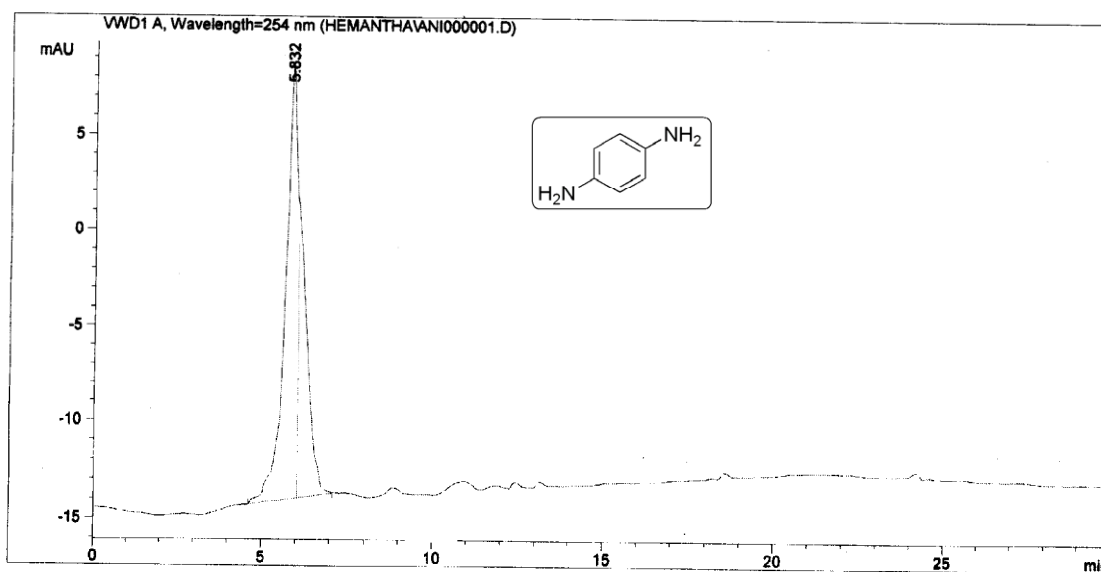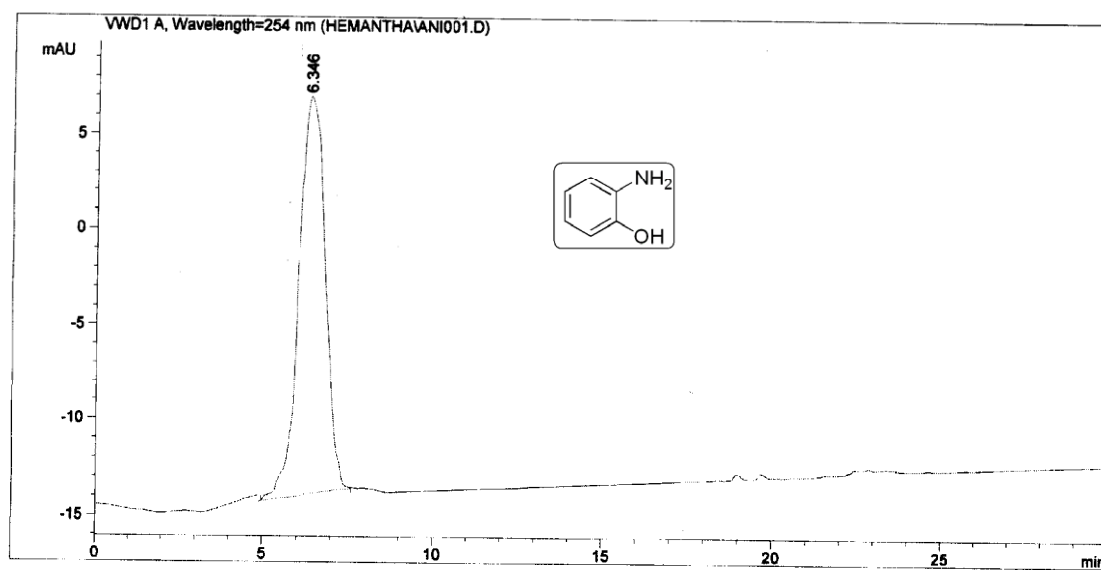

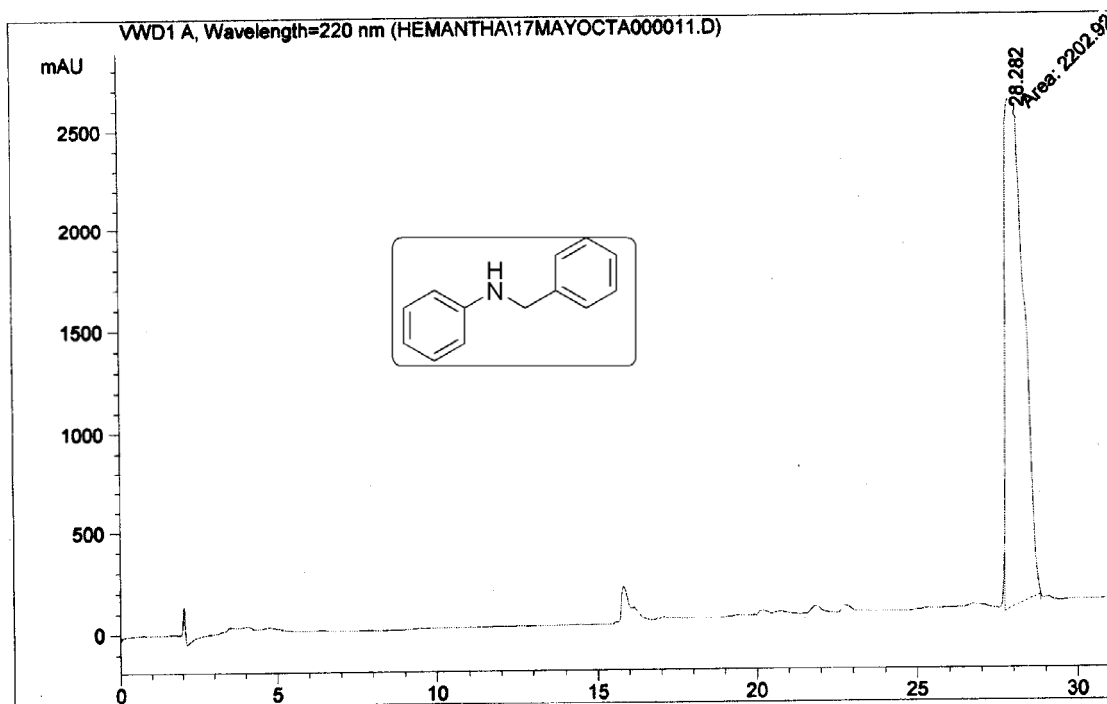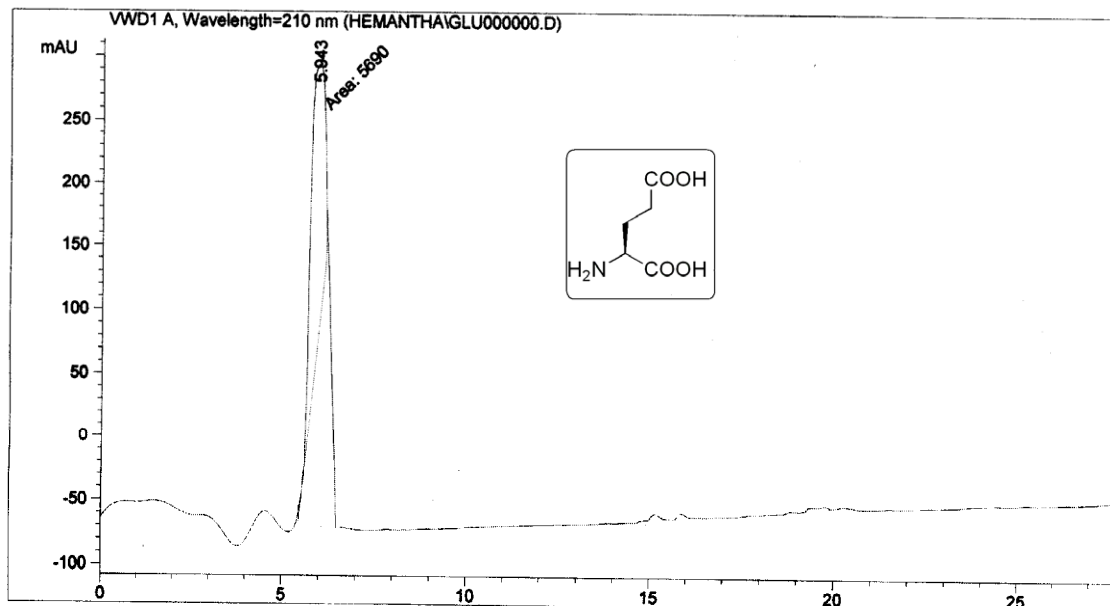

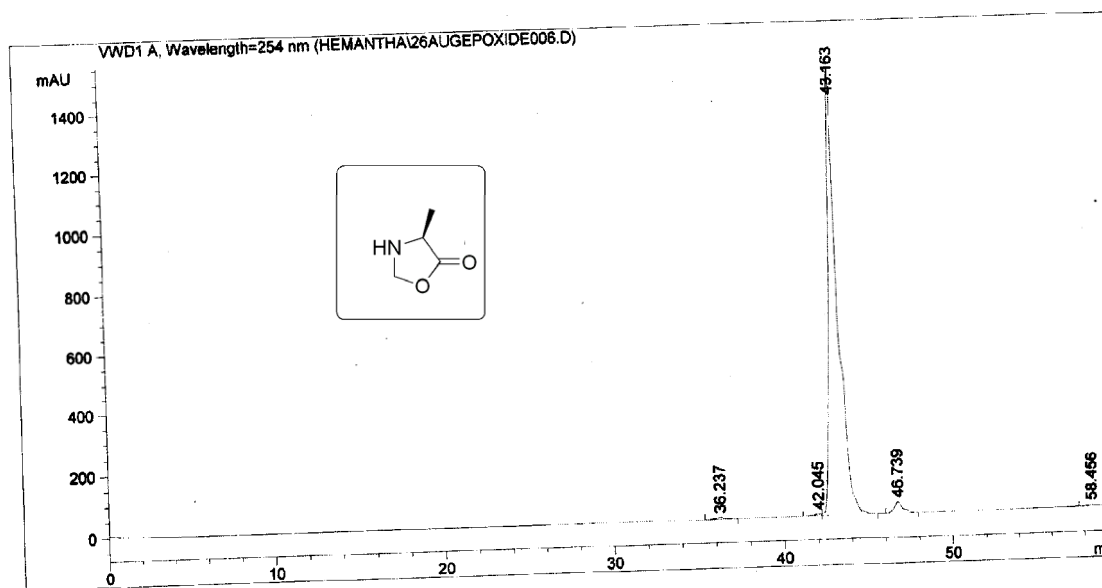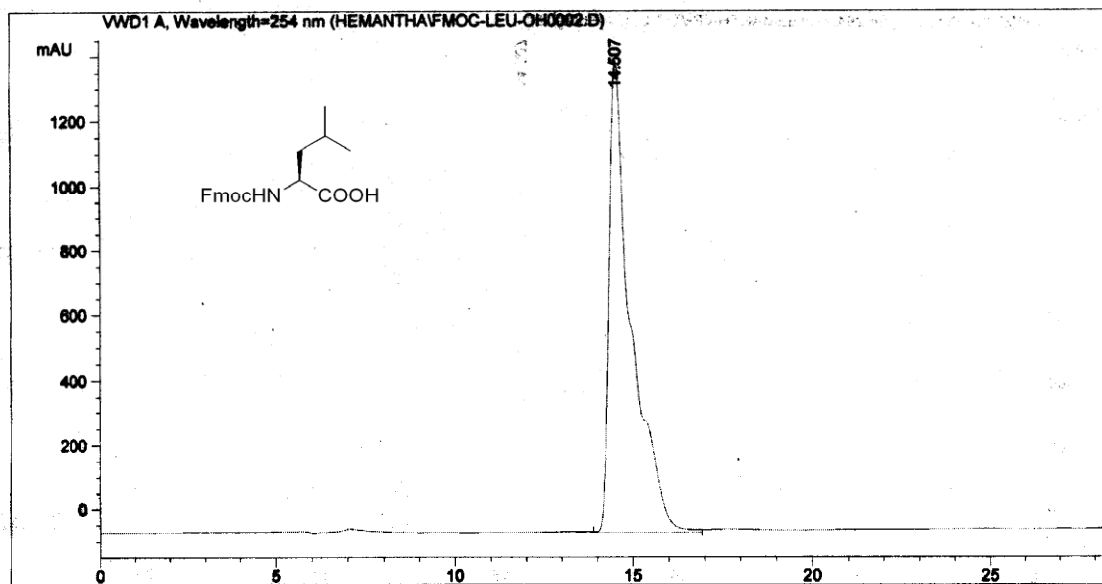

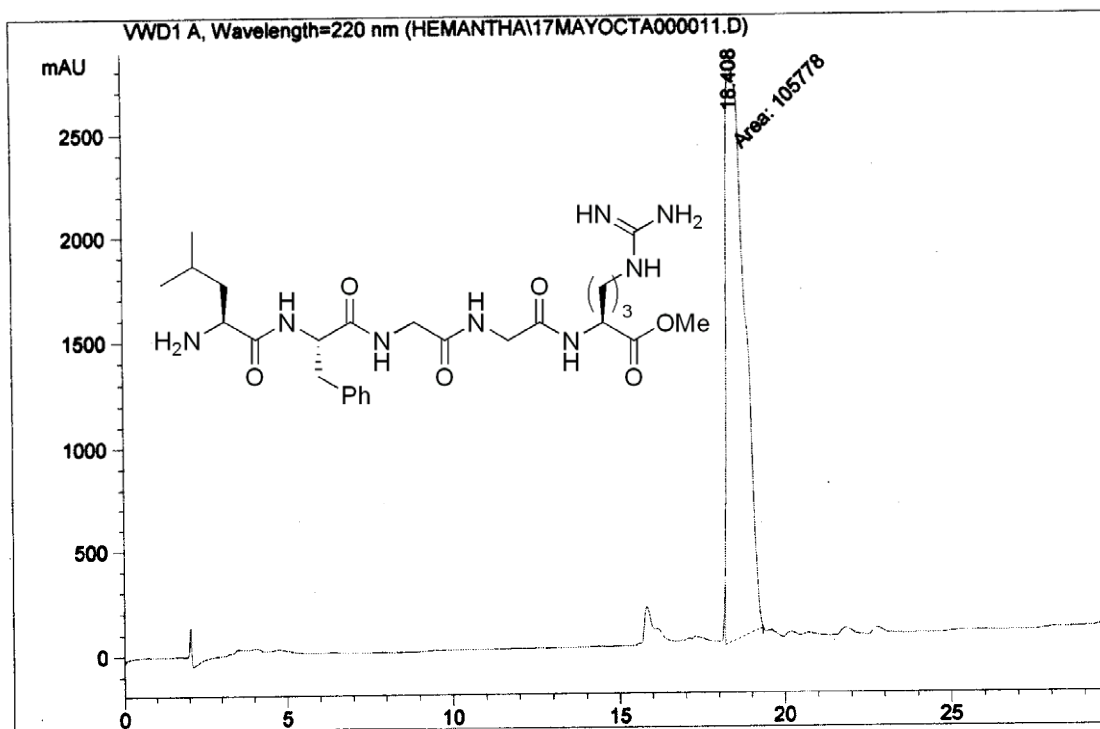

HP-

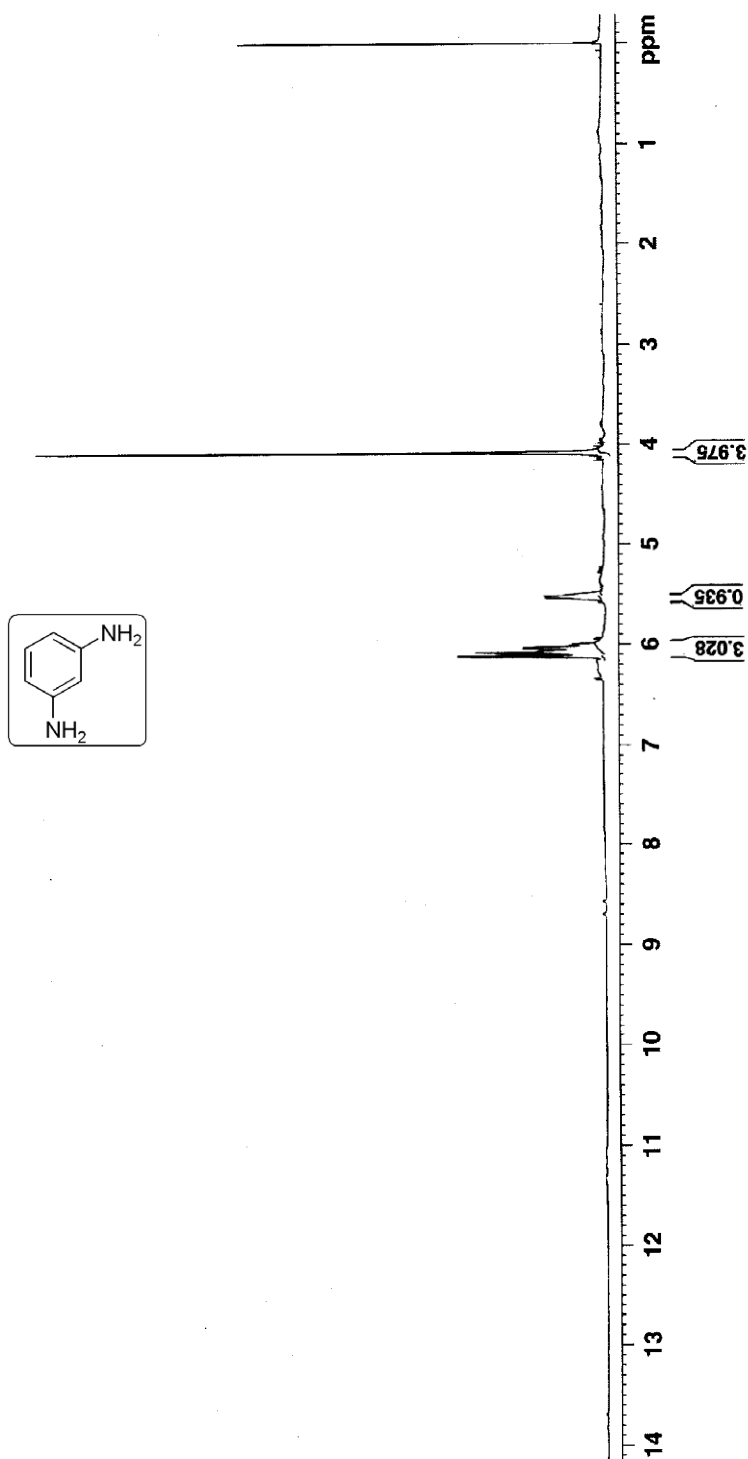

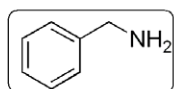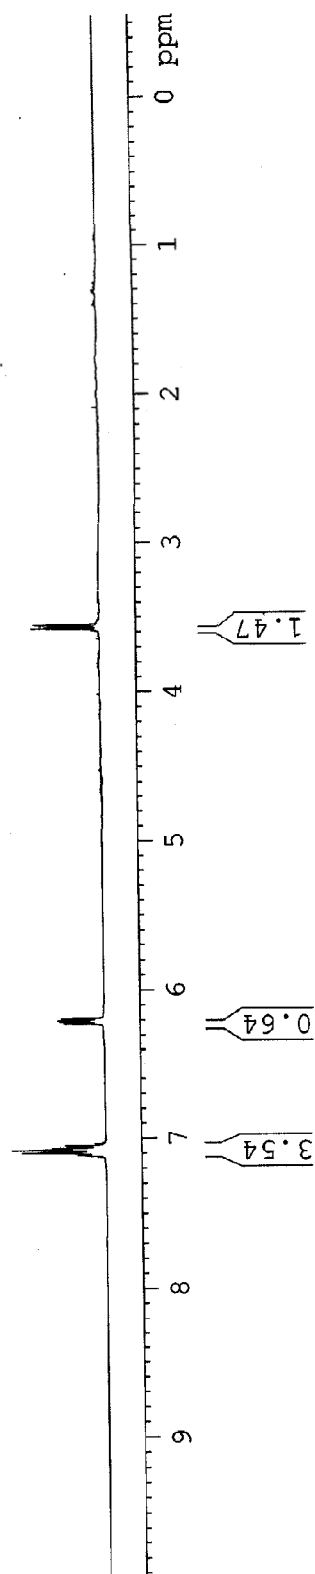

HP-5

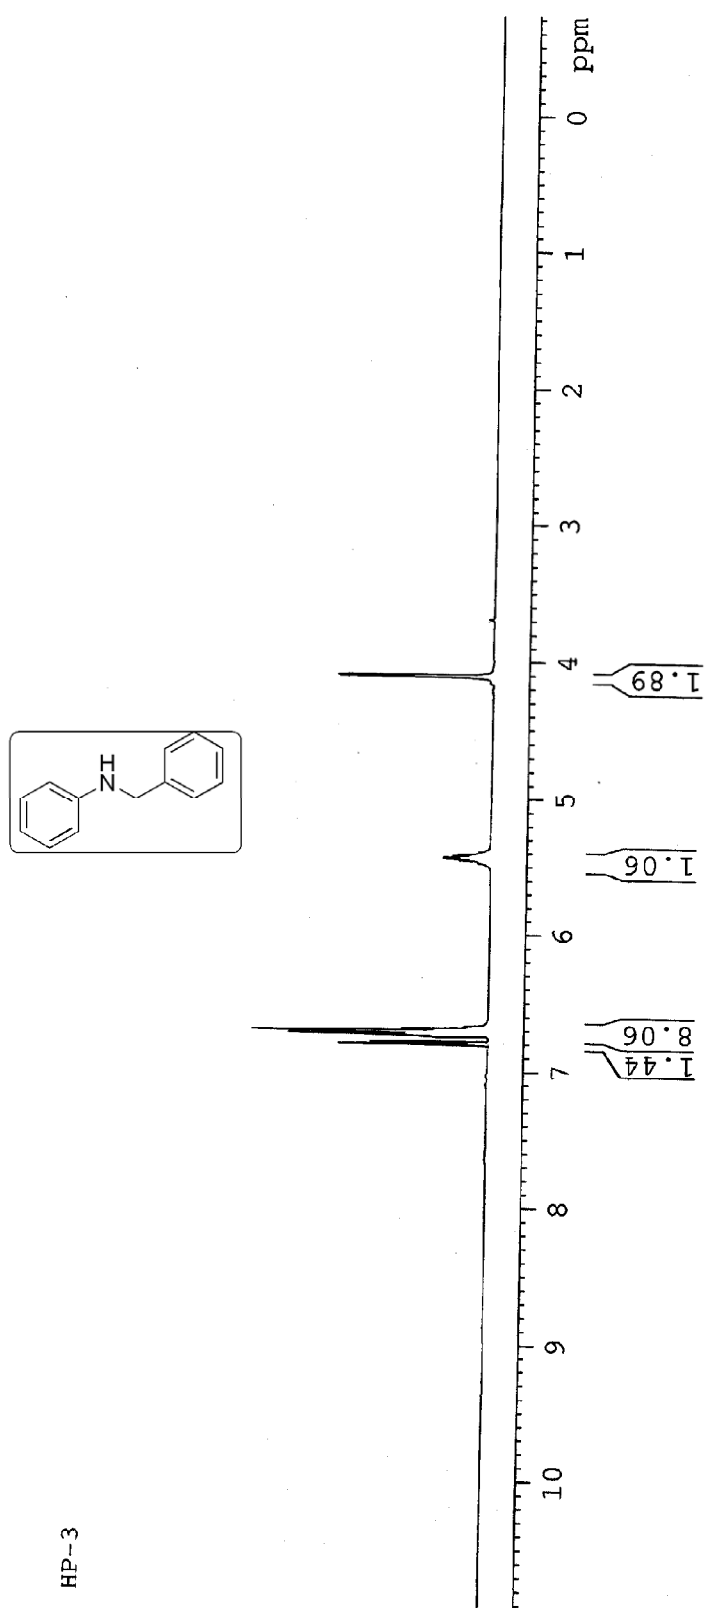



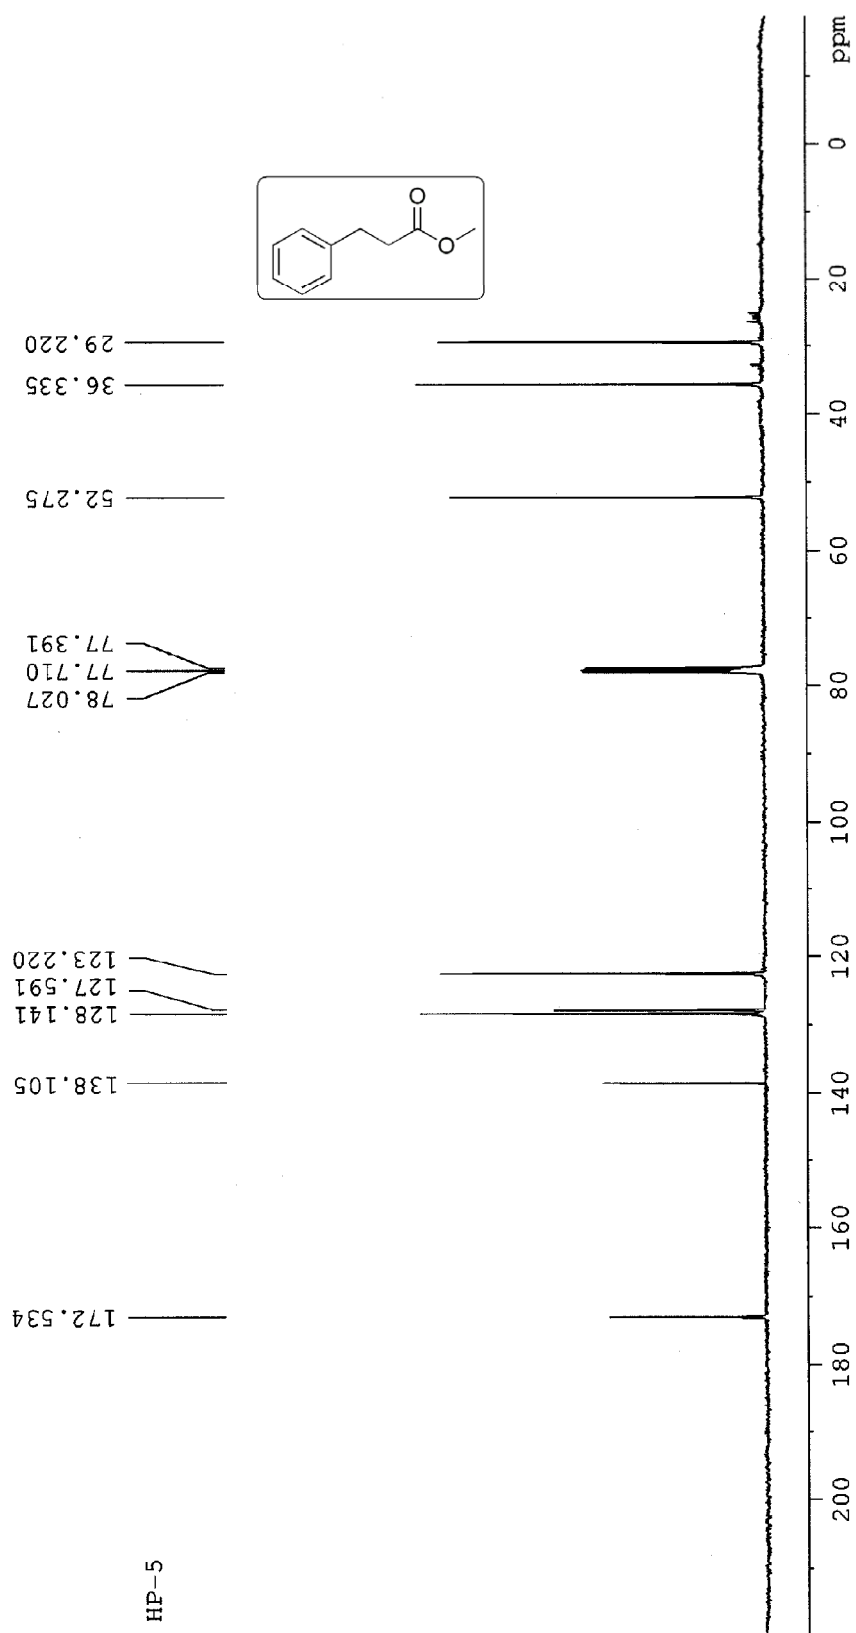

HP-

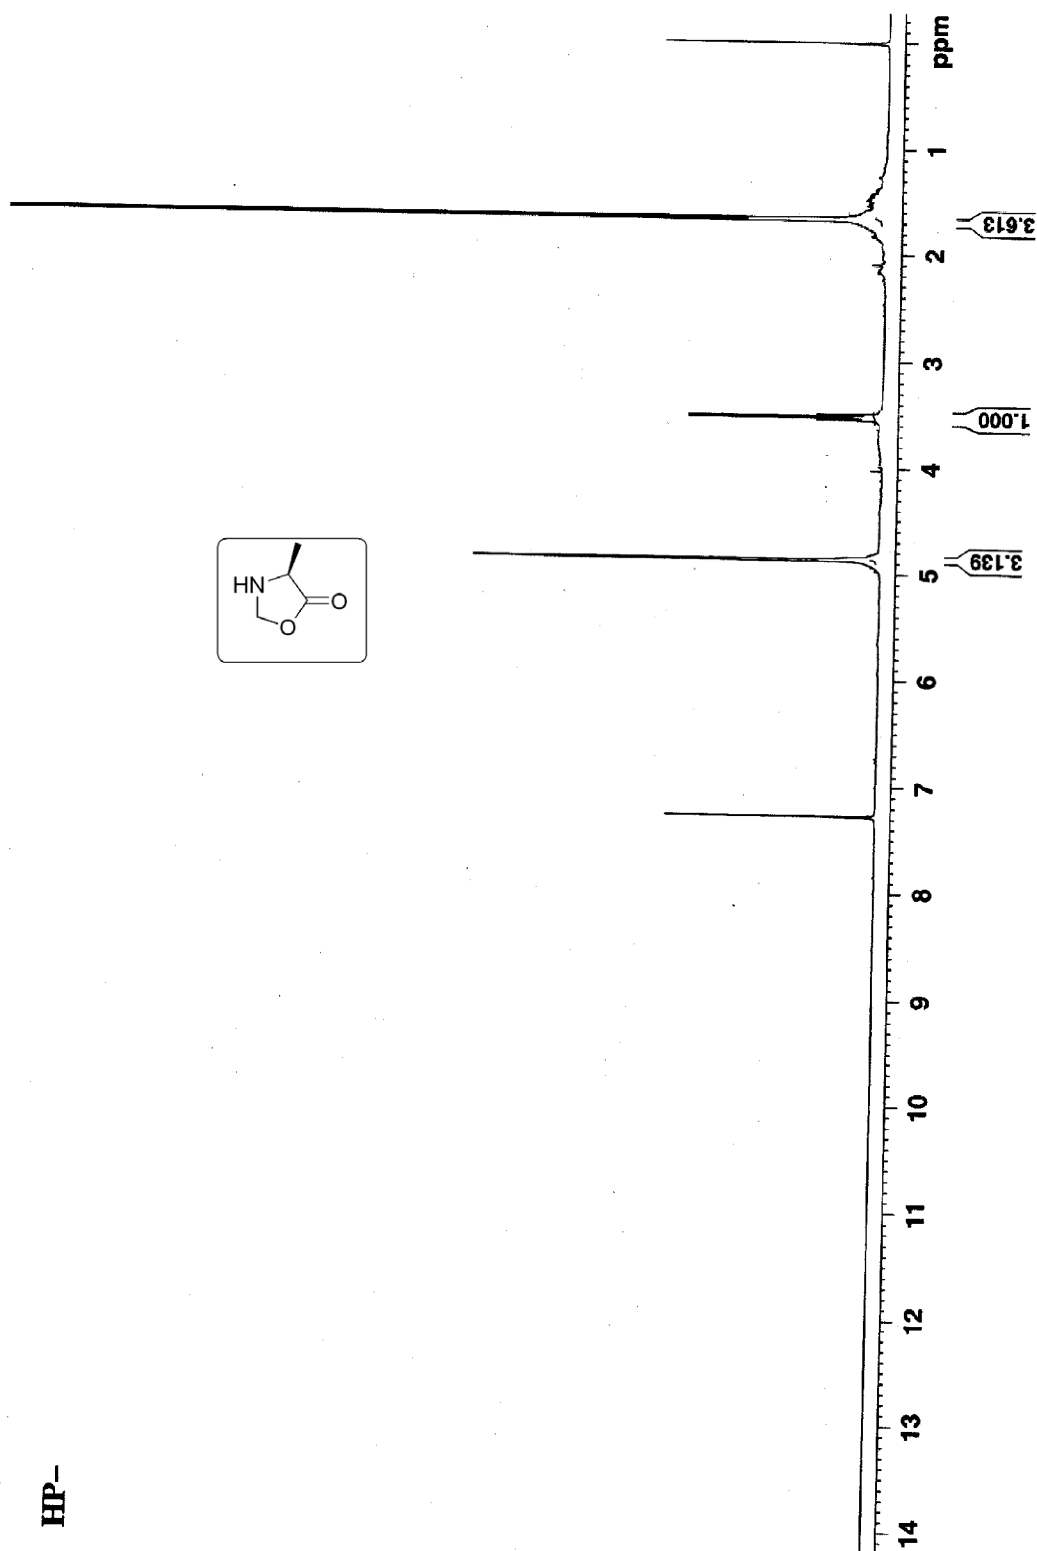

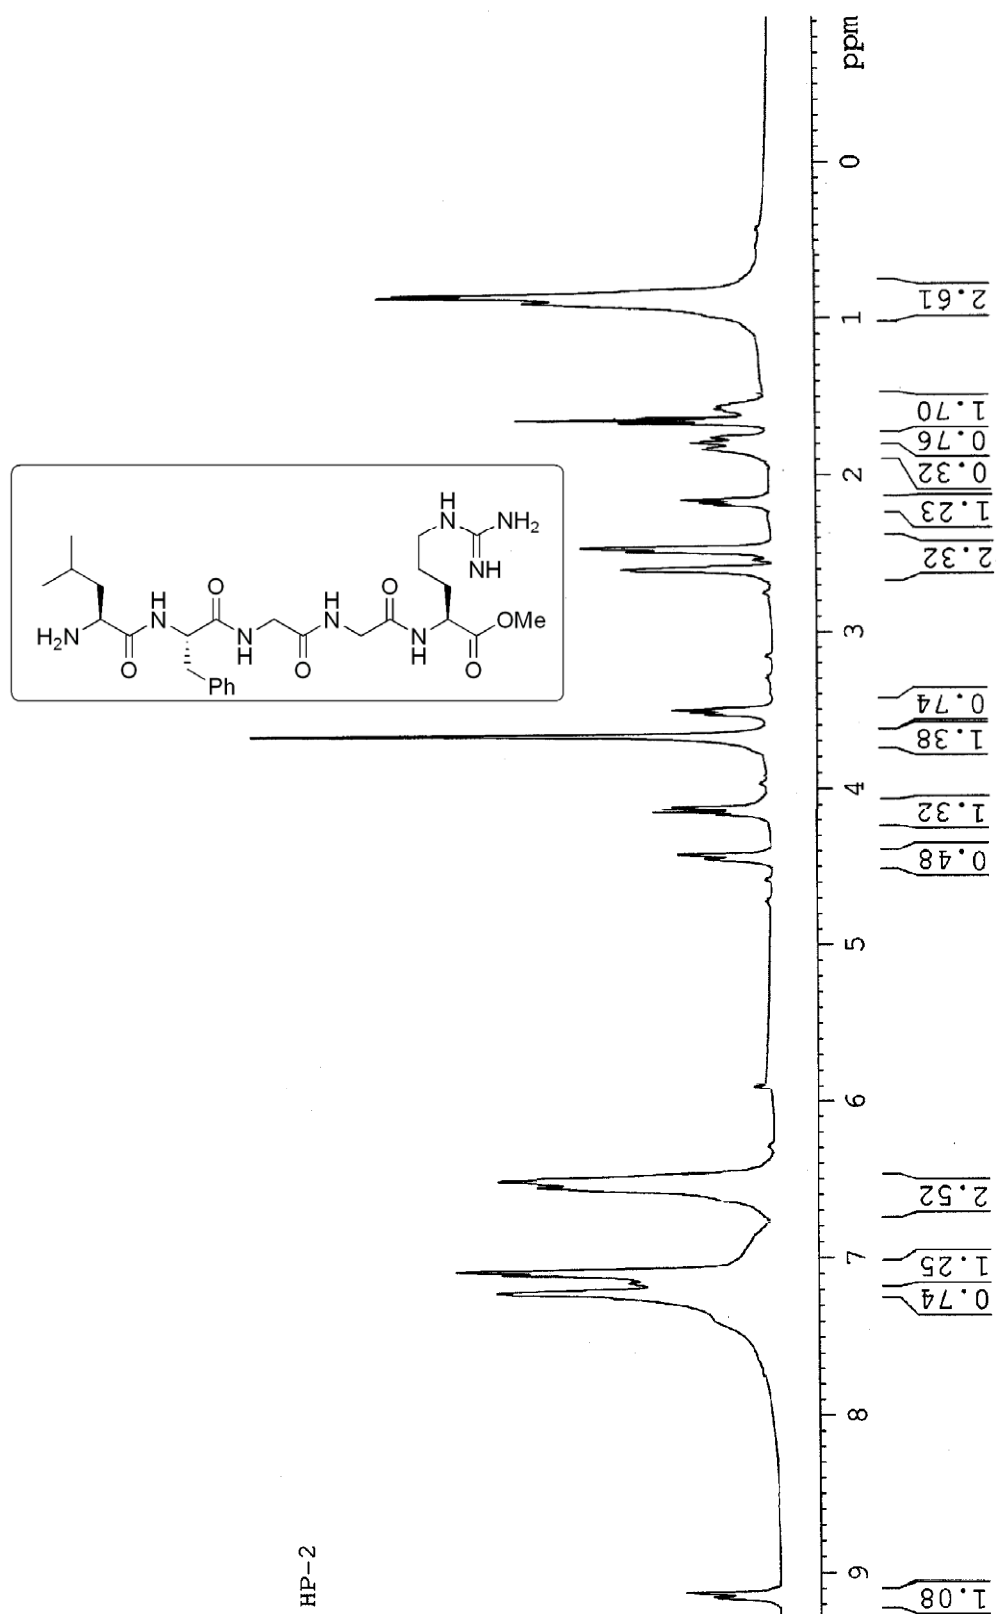

Supplement: c0ob00962h.pdf [file c0ob00962h.pdf]
